# Supplementary material for: Development, Characterization and Experimental Validation of a Cultivated Sunflower (Helianthus annuus L.) Gene Expression Oligonucleotide Microarray
Source: PLoS One. 2012 Oct 26;7(10):e45899. doi: 10.1371/journal.pone.0045899 (PMC3482228; doi:10.1371/journal.pone.0045899)
Supplement: Table S1 — GO terms for SUR v 1.0. (XLSX) [file pone.0045899.s003.xlsx]

## Sheet: Hoja1
Table S2.GO terms for SUR v 1.0.
HeAn_S_25084_GE486139	GO:0005524
HeAn_S_25084_GE486139	GO:0009532
HeAn_S_25084_GE486139	GO:0005515
HeAn_S_25084_GE486139	GO:0032559
HeAn_S_25084_GE486139	GO:0044267
HeAn_S_25084_GE486139	GO:0050896
HeAn_S_25085_GE486138	GO:0050896
HeAn_S_25085_GE486138	GO:0009532
HeAn_S_25085_GE486138	GO:0032559
HeAn_S_25085_GE486138	GO:0005524
HeAn_S_25085_GE486138	GO:0005515
HeAn_S_25085_GE486138	GO:0044267
HeAn_S_25087_GE488314	GO:0044464
HeAn_S_25087_GE488314	GO:0016020
HeAn_S_25091_GE486752	GO:0005524
HeAn_S_25091_GE486752	GO:0003676
HeAn_S_25091_GE486752	GO:0003677
HeAn_S_25093_GE486128	GO:0008219
HeAn_S_25093_GE486128	GO:0016021
HeAn_S_25095_GE486123	GO:0008152
HeAn_S_25095_GE486123	GO:0003824
HeAn_S_25100_GE486742	GO:0006508
HeAn_S_25100_GE486742	GO:0019538
HeAn_S_25100_GE486742	GO:0004175
HeAn_S_25100_GE486742	GO:0003824
HeAn_S_25100_GE486742	GO:0004252
HeAn_S_25100_GE486742	GO:0005515
HeAn_S_25101_GE486736	GO:0031224
HeAn_S_25101_GE486736	GO:0006810
HeAn_S_25103_GE486117	GO:0044237
HeAn_S_25103_GE486117	GO:0005524
HeAn_S_25103_GE486117	GO:0005488
HeAn_S_25103_GE486117	GO:0004765
HeAn_S_25103_GE486117	GO:0016740
HeAn_S_25103_GE486117	GO:0005737
HeAn_S_25104_GE486115	GO:0019359
HeAn_S_25104_GE486115	GO:0015922
HeAn_S_25104_GE486115	GO:0044424
HeAn_S_25104_GE486115	GO:0009055
HeAn_S_25104_GE486115	GO:0055114
HeAn_S_25104_GE486115	GO:0016491
HeAn_S_25105_GE486114	GO:0015922
HeAn_S_25105_GE486114	GO:0016491
HeAn_S_25105_GE486114	GO:0019359
HeAn_S_25105_GE486114	GO:0055114
HeAn_S_25105_GE486114	GO:0009055
HeAn_S_25105_GE486114	GO:0044424
HeAn_S_25107_GE486112	GO:0005634
HeAn_S_25107_GE486112	GO:0003712
HeAn_S_25107_GE486112	GO:0000989
HeAn_S_25107_GE486112	GO:0032501
HeAn_S_25107_GE486112	GO:0043231
HeAn_S_25108_GE486108	GO:0032559
HeAn_S_25108_GE486108	GO:0009207
HeAn_S_25108_GE486108	GO:0031224
HeAn_S_25108_GE486108	GO:0015662
HeAn_S_25108_GE486108	GO:0006811
HeAn_S_25108_GE486108	GO:0009206
HeAn_S_25108_GE486108	GO:0043169
HeAn_S_25108_GE486108	GO:0006818
HeAn_S_25113_GE488284	GO:0003824
HeAn_S_25113_GE488284	GO:0008152
HeAn_S_25113_GE488284	GO:0003824
HeAn_S_25116_GE486725	GO:0006887
HeAn_S_25116_GE486725	GO:0016192
HeAn_S_25116_GE486725	GO:0006904
HeAn_S_25118_GE486104	GO:0005515
HeAn_S_25118_GE486104	GO:0044424
HeAn_S_25118_GE486104	GO:0005543
HeAn_S_25118_GE486104	GO:0005543
HeAn_S_25118_GE486104	GO:0050794
HeAn_S_25118_GE486104	GO:0006351
HeAn_S_25121_GE486093	GO:0006730
HeAn_S_25121_GE486093	GO:0004013
HeAn_S_25122_GE490797	GO:0043231
HeAn_S_25122_GE490797	GO:0005783
HeAn_S_25123_GE490795	GO:0003824
HeAn_S_25125_GE490792	GO:0043231
HeAn_S_25127_GE490789	GO:0006266
HeAn_S_25127_GE490789	GO:0006310
HeAn_S_25127_GE490789	GO:0003676
HeAn_S_25127_GE490789	GO:0006281
HeAn_S_25127_GE490789	GO:0032559
HeAn_S_25127_GE490789	GO:0003909
HeAn_S_25127_GE490789	GO:0003677
HeAn_S_25127_GE490789	GO:0033554
HeAn_S_25127_GE490789	GO:0003910
HeAn_S_25128_GE490787	GO:0003677
HeAn_S_25128_GE490787	GO:0043231
HeAn_S_25128_GE490787	GO:0005634
HeAn_S_25128_GE490787	GO:0003676
HeAn_S_25128_GE490787	GO:0006351
HeAn_S_25128_GE490787	GO:0006352
HeAn_S_25128_GE490787	GO:0006464
HeAn_S_25128_GE490787	GO:0016570
HeAn_S_25133_GE490774	GO:0003676
HeAn_S_25133_GE490774	GO:0010467
HeAn_S_25135_GE488690	GO:0048037
HeAn_S_25135_GE488690	GO:0055114
HeAn_S_25135_GE488690	GO:0016616
HeAn_S_25135_GE488690	GO:0006072
HeAn_S_25135_GE488690	GO:0016616
HeAn_S_25135_GE488690	GO:0000166
HeAn_S_25135_GE488690	GO:0006072
HeAn_S_25135_GE488690	GO:0043234
HeAn_S_25135_GE488690	GO:0016614
HeAn_S_25135_GE488690	GO:0009331
HeAn_S_25135_GE488690	GO:0005975
HeAn_S_25135_GE488690	GO:0004367
HeAn_S_25135_GE488690	GO:0044424
HeAn_S_25135_GE488690	GO:0016491
HeAn_S_25135_GE488690	GO:0050662
HeAn_S_25136_GE488689	GO:0044424
HeAn_S_25136_GE488689	GO:0055114
HeAn_S_25136_GE488689	GO:0009331
HeAn_S_25136_GE488689	GO:0000166
HeAn_S_25136_GE488689	GO:0006072
HeAn_S_25136_GE488689	GO:0043234
HeAn_S_25136_GE488689	GO:0048037
HeAn_S_25136_GE488689	GO:0016616
HeAn_S_25136_GE488689	GO:0004367
HeAn_S_25136_GE488689	GO:0006072
HeAn_S_25140_GE488684	GO:0008152
HeAn_S_25140_GE488684	GO:0003824
HeAn_S_25144_GE486507	GO:0003723
HeAn_S_25147_GE486504	GO:0003824
HeAn_S_25147_GE486504	GO:0044464
HeAn_S_25149_GE486497	GO:0044464
HeAn_S_25150_GE486496	GO:0005622
HeAn_S_25151_GE488677	GO:0043531
HeAn_S_25153_GE488672	GO:0004363
HeAn_S_25153_GE488672	GO:0006750
HeAn_S_25153_GE488672	GO:0005524
HeAn_S_25154_GE488671	GO:0003677
HeAn_S_25154_GE488671	GO:0046872
HeAn_S_25154_GE488671	GO:0006355
HeAn_S_25155_GE486495	GO:0044238
HeAn_S_25155_GE486495	GO:0016298
HeAn_S_25155_GE486495	GO:0006629
HeAn_S_25155_GE486495	GO:0004806
HeAn_S_25156_GE486494	GO:0016787
HeAn_S_25156_GE486494	GO:0006629
HeAn_S_25156_GE486494	GO:0004806
HeAn_S_25158_GE486490	GO:0042623
HeAn_S_25158_GE486490	GO:0032559
HeAn_S_25160_GE486488	GO:0043231
HeAn_S_25161_GE486485	GO:0016301
HeAn_S_25161_GE486485	GO:0006796
HeAn_S_25161_GE486485	GO:0016773
HeAn_S_25161_GE486485	GO:0008152
HeAn_S_25161_GE486485	GO:0005524
HeAn_S_25161_GE486485	GO:0032559
HeAn_S_25161_GE486485	GO:0009174
HeAn_S_25161_GE486485	GO:0019206
HeAn_S_25166_GE488658	GO:0032559
HeAn_S_25166_GE488658	GO:0016879
HeAn_S_25166_GE488658	GO:0016421
HeAn_S_25166_GE488658	GO:0005524
HeAn_S_25166_GE488658	GO:0006631
HeAn_S_25166_GE488658	GO:0009536
HeAn_S_25166_GE488658	GO:0008152
HeAn_S_25166_GE488658	GO:0043169
HeAn_S_25166_GE488658	GO:0003824
HeAn_S_25168_GE488656	GO:0006508
HeAn_S_25168_GE488656	GO:0005838
HeAn_S_25169_GE486479	GO:0031224
HeAn_S_25169_GE486479	GO:0071702
HeAn_S_25169_GE486479	GO:0015291
HeAn_S_25169_GE486479	GO:0022857
HeAn_S_25169_GE486479	GO:0022891
HeAn_S_25169_GE486479	GO:0016020
HeAn_S_25169_GE486479	GO:0055085
HeAn_S_25169_GE486479	GO:0016021
HeAn_S_25170_GE488652	GO:0005515
HeAn_S_25171_GE488650	GO:0005506
HeAn_S_25171_GE488650	GO:0055114
HeAn_S_25171_GE488650	GO:0016491
HeAn_S_25171_GE488650	GO:0009055
HeAn_S_25171_GE488650	GO:0005506
HeAn_S_25171_GE488650	GO:0016705
HeAn_S_25171_GE488650	GO:0020037
HeAn_S_25172_GE488649	GO:0009055
HeAn_S_25172_GE488649	GO:0016491
HeAn_S_25172_GE488649	GO:0008152
HeAn_S_25172_GE488649	GO:0055114
HeAn_S_25172_GE488649	GO:0016705
HeAn_S_25172_GE488649	GO:0005506
HeAn_S_25172_GE488649	GO:0020037
HeAn_S_25172_GE488649	GO:0005506
HeAn_S_25173_GE488648	GO:0006796
HeAn_S_25173_GE488648	GO:0005975
HeAn_S_25173_GE488648	GO:0032559
HeAn_S_25173_GE488648	GO:0009532
HeAn_S_25173_GE488648	GO:0016773
HeAn_S_25173_GE488648	GO:0006007
HeAn_S_25173_GE488648	GO:0016773
HeAn_S_25173_GE488648	GO:0005524
HeAn_S_25174_GE488645	GO:0006464
HeAn_S_25174_GE488645	GO:0032559
HeAn_S_25174_GE488645	GO:0004672
HeAn_S_25178_GE486464	GO:0005488
HeAn_S_25178_GE486464	GO:0005515
HeAn_S_25178_GE486464	GO:0044267
HeAn_S_25180_GE486462	GO:0003700
HeAn_S_25180_GE486462	GO:0043565
HeAn_S_25180_GE486462	GO:0006355
HeAn_S_25182_GE488637	GO:0016772
HeAn_S_25183_GE488636	GO:0016772
HeAn_S_25186_GE488631	GO:0055085
HeAn_S_25186_GE488631	GO:0006810
HeAn_S_25186_GE488631	GO:0016021
HeAn_S_25186_GE488631	GO:0031224
HeAn_S_25187_GE488630	GO:0031224
HeAn_S_25187_GE488630	GO:0043231
HeAn_S_25187_GE488630	GO:0006810
HeAn_S_25188_GE486453	GO:0009536
HeAn_S_25188_GE486453	GO:0032559
HeAn_S_25188_GE486453	GO:0006457
HeAn_S_25188_GE486453	GO:0005524
HeAn_S_25188_GE486453	GO:0005515
HeAn_S_25188_GE486453	GO:0044267
HeAn_S_25191_GE486450	GO:0044238
HeAn_S_25191_GE486450	GO:0016787
HeAn_S_25192_GE486449	GO:0044238
HeAn_S_25192_GE486449	GO:0006629
HeAn_S_25192_GE486449	GO:0016788
HeAn_S_25192_GE486449	GO:0016787
HeAn_S_25193_GE486447	GO:0003824
HeAn_S_25195_GE488625	GO:0005515
HeAn_S_25196_GE488624	GO:0005515
HeAn_S_25200_GE486443	GO:0005515
HeAn_S_25201_GE486441	GO:0003676
HeAn_S_25201_GE486441	GO:0006351
HeAn_S_25203_GE486438	GO:0005634
HeAn_S_25203_GE486438	GO:0006355
HeAn_S_25205_GE488614	GO:0031410
HeAn_S_25206_GE488613	GO:0055114
HeAn_S_25206_GE488613	GO:0016491
HeAn_S_25206_GE488613	GO:0016705
HeAn_S_25206_GE488613	GO:0008152
HeAn_S_25206_GE488613	GO:0005506
HeAn_S_25206_GE488613	GO:0005506
HeAn_S_25206_GE488613	GO:0020037
HeAn_S_25206_GE488613	GO:0009055
HeAn_S_25208_GE488609	GO:0045735
HeAn_S_25209_GE488605	GO:0016070
HeAn_S_25209_GE488605	GO:0006412
HeAn_S_25209_GE488605	GO:0005488
HeAn_S_25209_GE488605	GO:0005488
HeAn_S_25210_GE488603	GO:0003824
HeAn_S_25212_GE486429	GO:0006810
HeAn_S_25213_GE486428	GO:0031224
HeAn_S_25213_GE486428	GO:0006812
HeAn_S_25213_GE486428	GO:0030001
HeAn_S_25213_GE486428	GO:0015385
HeAn_S_25213_GE486428	GO:0005451
HeAn_S_25213_GE486428	GO:0016021
HeAn_S_25213_GE486428	GO:0006885
HeAn_S_25213_GE486428	GO:0055067
HeAn_S_25213_GE486428	GO:0006814
HeAn_S_25213_GE486428	GO:0055085
HeAn_S_25213_GE486428	GO:0015299
HeAn_S_25214_GE486427	GO:0044464
HeAn_S_25214_GE486427	GO:0016301
HeAn_S_25214_GE486427	GO:0016772
HeAn_S_25216_GE488597	GO:0006796
HeAn_S_25216_GE488597	GO:0006464
HeAn_S_25216_GE488597	GO:0032559
HeAn_S_25216_GE488597	GO:0004672
HeAn_S_25218_GE488592	GO:0016021
HeAn_S_25218_GE488592	GO:0031224
HeAn_S_25220_GE486416	GO:0016772
HeAn_S_25220_GE486416	GO:0044237
HeAn_S_25220_GE486416	GO:0005515
HeAn_S_25221_GE486414	GO:0005515
HeAn_S_25227_GE490237	GO:0005515
HeAn_S_25227_GE490237	GO:0003676
HeAn_S_25228_GE490236	GO:0003676
HeAn_S_25228_GE490236	GO:0005515
HeAn_S_25228_GE490236	GO:0005488
HeAn_S_25230_GE490231	GO:0009058
HeAn_S_25230_GE490231	GO:0006779
HeAn_S_25230_GE490231	GO:0051003
HeAn_S_25231_GE490230	GO:0009058
HeAn_S_25231_GE490230	GO:0051003
HeAn_S_25231_GE490230	GO:0005488
HeAn_S_25231_GE490230	GO:0006779
HeAn_S_25233_GE490227	GO:0006796
HeAn_S_25233_GE490227	GO:0004672
HeAn_S_25233_GE490227	GO:0000166
HeAn_S_25236_GE489002	GO:0016757
HeAn_S_25236_GE489002	GO:0016740
HeAn_S_25237_GE489001	GO:0016740
HeAn_S_25238_GE488998	GO:0003676
HeAn_S_25238_GE488998	GO:0005634
HeAn_S_25241_GE488993	GO:0005488
HeAn_S_25242_GE488992	GO:0042625
HeAn_S_25242_GE488992	GO:0006812
HeAn_S_25242_GE488992	GO:0015662
HeAn_S_25242_GE488992	GO:0006812
HeAn_S_25242_GE488992	GO:0016020
HeAn_S_25242_GE488992	GO:0008152
HeAn_S_25242_GE488992	GO:0006754
HeAn_S_25242_GE488992	GO:0000166
HeAn_S_25242_GE488992	GO:0016020
HeAn_S_25243_GE490223	GO:0031224
HeAn_S_25243_GE490223	GO:0015075
HeAn_S_25243_GE490223	GO:0006811
HeAn_S_25244_GE490222	GO:0031224
HeAn_S_25244_GE490222	GO:0006810
HeAn_S_25244_GE490222	GO:0019866
HeAn_S_25245_GE490221	GO:0016020
HeAn_S_25246_GE490219	GO:0016757
HeAn_S_25246_GE490219	GO:0016740
HeAn_S_25247_GE488991	GO:0032559
HeAn_S_25247_GE488991	GO:0019829
HeAn_S_25247_GE488991	GO:0031224
HeAn_S_25247_GE488991	GO:0046872
HeAn_S_25247_GE488991	GO:0016020
HeAn_S_25247_GE488991	GO:0006812
HeAn_S_25247_GE488991	GO:0009206
HeAn_S_25247_GE488991	GO:0043169
HeAn_S_25247_GE488991	GO:0000166
HeAn_S_25247_GE488991	GO:0015662
HeAn_S_25247_GE488991	GO:0070838
HeAn_S_25247_GE488991	GO:0006754
HeAn_S_25250_GE488986	GO:0006779
HeAn_S_25250_GE488986	GO:0009058
HeAn_S_25250_GE488986	GO:0051003
HeAn_S_25251_GE488985	GO:0005783
HeAn_S_25251_GE488985	GO:0043231
HeAn_S_25253_GE490212	GO:0003824
HeAn_S_25253_GE490212	GO:0003824
HeAn_S_25253_GE490212	GO:0008152
HeAn_S_25255_GE490209	GO:0003676
HeAn_S_25255_GE490209	GO:0046914
HeAn_S_25255_GE490209	GO:0008270
HeAn_S_25255_GE490209	GO:0044464
HeAn_S_25255_GE490209	GO:0005622
HeAn_S_25256_GE490208	GO:0000166
HeAn_S_25256_GE490208	GO:0004672
HeAn_S_25257_GE490207	GO:0004672
HeAn_S_25257_GE490207	GO:0000166
HeAn_S_25258_GE490202	GO:0046914
HeAn_S_25258_GE490202	GO:0005622
HeAn_S_25258_GE490202	GO:0003677
HeAn_S_25258_GE490202	GO:0003676
HeAn_S_25258_GE490202	GO:0044464
HeAn_S_25259_GE490201	GO:0003676
HeAn_S_25259_GE490201	GO:0046914
HeAn_S_25259_GE490201	GO:0043231
HeAn_S_25260_GE488978	GO:0005515
HeAn_S_25267_GE490200	GO:0016788
HeAn_S_25267_GE490200	GO:0030599
HeAn_S_25267_GE490200	GO:0042545
HeAn_S_25267_GE490200	GO:0005618
HeAn_S_25268_GE490194	GO:0044424
HeAn_S_25268_GE490194	GO:0048500
HeAn_S_25268_GE490194	GO:0008312
HeAn_S_25268_GE490194	GO:0006614
HeAn_S_25268_GE490194	GO:0005488
HeAn_S_25271_GE490190	GO:0009055
HeAn_S_25271_GE490190	GO:0005506
HeAn_S_25271_GE490190	GO:0020037
HeAn_S_25271_GE490190	GO:0055114
HeAn_S_25271_GE490190	GO:0016705
HeAn_S_25271_GE490190	GO:0005506
HeAn_S_25271_GE490190	GO:0016491
HeAn_S_25272_GE490189	GO:0016491
HeAn_S_25272_GE490189	GO:0016705
HeAn_S_25272_GE490189	GO:0009055
HeAn_S_25272_GE490189	GO:0005506
HeAn_S_25272_GE490189	GO:0055114
HeAn_S_25272_GE490189	GO:0005506
HeAn_S_25272_GE490189	GO:0020037
HeAn_S_25274_GE488965	GO:0046914
HeAn_S_25275_GE488963	GO:0005515
HeAn_S_25275_GE488963	GO:0005634
HeAn_S_25275_GE488963	GO:0009755
HeAn_S_25275_GE488963	GO:0006355
HeAn_S_25275_GE488963	GO:0043231
HeAn_S_25275_GE488963	GO:0006351
HeAn_S_25279_GE490182	GO:0006464
HeAn_S_25279_GE490182	GO:0006796
HeAn_S_25279_GE490182	GO:0006468
HeAn_S_25279_GE490182	GO:0032559
HeAn_S_25279_GE490182	GO:0004672
HeAn_S_25279_GE490182	GO:0004672
HeAn_S_25279_GE490182	GO:0016772
HeAn_S_25280_GE490181	GO:0032559
HeAn_S_25280_GE490181	GO:0004672
HeAn_S_25280_GE490181	GO:0006464
HeAn_S_25280_GE490181	GO:0006796
HeAn_S_25283_GE488952	GO:0005524
HeAn_S_25283_GE488952	GO:0004814
HeAn_S_25283_GE488952	GO:0006420
HeAn_S_25283_GE488952	GO:0005737
HeAn_S_25283_GE488952	GO:0000166
HeAn_S_25285_GE488950	GO:0060089
HeAn_S_25285_GE488950	GO:0023052
HeAn_S_25285_GE488950	GO:0009314
HeAn_S_25292_GE490168	GO:0005488
HeAn_S_25293_GE490163	GO:0008152
HeAn_S_25293_GE490163	GO:0003824
HeAn_S_25294_GE490162	GO:0005507
HeAn_S_25294_GE490162	GO:0009808
HeAn_S_25294_GE490162	GO:0016491
HeAn_S_25294_GE490162	GO:0016682
HeAn_S_25294_GE490162	GO:0046914
HeAn_S_25294_GE490162	GO:0055114
HeAn_S_25294_GE490162	GO:0005576
HeAn_S_25295_GE488939	GO:0005783
HeAn_S_25296_GE488938	GO:0046933
HeAn_S_25296_GE488938	GO:0019829
HeAn_S_25296_GE488938	GO:0015986
HeAn_S_25296_GE488938	GO:0033178
HeAn_S_25296_GE488938	GO:0015986
HeAn_S_25296_GE488938	GO:0046961
HeAn_S_25296_GE488938	GO:0015078
HeAn_S_25296_GE488938	GO:0009534
HeAn_S_25296_GE488938	GO:0045261
HeAn_S_25296_GE488938	GO:0032559
HeAn_S_25299_GE488928	GO:0044424
HeAn_S_25299_GE488928	GO:0006730
HeAn_S_25299_GE488928	GO:0050896
HeAn_S_25299_GE488928	GO:0008170
HeAn_S_25299_GE488928	GO:0008152
HeAn_S_25299_GE488928	GO:0008168
HeAn_S_25299_GE488928	GO:0006644
HeAn_S_25300_GE490160	GO:0044424
HeAn_S_25300_GE490160	GO:0005663
HeAn_S_25300_GE490160	GO:0000166
HeAn_S_25300_GE490160	GO:0003689
HeAn_S_25300_GE490160	GO:0003677
HeAn_S_25300_GE490160	GO:0005524
HeAn_S_25300_GE490160	GO:0006260
HeAn_S_25300_GE490160	GO:0016462
HeAn_S_25301_GE490159	GO:0005524
HeAn_S_25301_GE490159	GO:0017111
HeAn_S_25301_GE490159	GO:0006260
HeAn_S_25301_GE490159	GO:0003677
HeAn_S_25301_GE490159	GO:0000166
HeAn_S_25301_GE490159	GO:0003677
HeAn_S_25301_GE490159	GO:0016462
HeAn_S_25301_GE490159	GO:0042575
HeAn_S_25301_GE490159	GO:0032559
HeAn_S_25301_GE490159	GO:0006259
HeAn_S_25301_GE490159	GO:0005657
HeAn_S_25301_GE490159	GO:0034061
HeAn_S_25303_GE490151	GO:0006464
HeAn_S_25303_GE490151	GO:0004672
HeAn_S_25303_GE490151	GO:0032559
HeAn_S_25303_GE490151	GO:0046872
HeAn_S_25303_GE490151	GO:0005509
HeAn_S_25303_GE490151	GO:0006796
HeAn_S_25305_GE488920	GO:0043231
HeAn_S_25315_GE488910	GO:0043231
HeAn_S_25322_GE489301	GO:0009755
HeAn_S_25322_GE489301	GO:0005515
HeAn_S_25322_GE489301	GO:0006355
HeAn_S_25322_GE489301	GO:0043231
HeAn_S_25322_GE489301	GO:0003676
HeAn_S_25322_GE489301	GO:0006351
HeAn_S_25322_GE489301	GO:0005634
HeAn_S_25323_GE489299	GO:0006351
HeAn_S_25323_GE489299	GO:0005515
HeAn_S_25323_GE489299	GO:0003676
HeAn_S_25323_GE489299	GO:0034062
HeAn_S_25323_GE489299	GO:0003677
HeAn_S_25323_GE489299	GO:0003899
HeAn_S_25323_GE489299	GO:0010467
HeAn_S_25323_GE489299	GO:0009536
HeAn_S_25323_GE489299	GO:0046983
HeAn_S_25325_GE489296	GO:0016773
HeAn_S_25325_GE489296	GO:0044237
HeAn_S_25329_GE485881	GO:0003676
HeAn_S_25329_GE485881	GO:0016462
HeAn_S_25329_GE485881	GO:0032559
HeAn_S_25331_GE485873	GO:0005622
HeAn_S_25331_GE485873	GO:0008092
HeAn_S_25331_GE485873	GO:0044464
HeAn_S_25331_GE485873	GO:0003779
HeAn_S_25332_GE485872	GO:0016740
HeAn_S_25333_GE485585	GO:0050896
HeAn_S_25333_GE485585	GO:0044267
HeAn_S_25333_GE485585	GO:0006457
HeAn_S_25333_GE485585	GO:0005515
HeAn_S_25333_GE485585	GO:0051082
HeAn_S_25333_GE485585	GO:0031072
HeAn_S_25334_GE485579	GO:0044249
HeAn_S_25334_GE485579	GO:0044238
HeAn_S_25337_GE485576	GO:0043234
HeAn_S_25337_GE485576	GO:0003824
HeAn_S_25337_GE485576	GO:0006464
HeAn_S_25337_GE485576	GO:0004721
HeAn_S_25337_GE485576	GO:0043169
HeAn_S_25338_GE485575	GO:0003700
HeAn_S_25338_GE485575	GO:0000996
HeAn_S_25338_GE485575	GO:0003677
HeAn_S_25338_GE485575	GO:0003676
HeAn_S_25338_GE485575	GO:0006352
HeAn_S_25338_GE485575	GO:0016987
HeAn_S_25338_GE485575	GO:0006355
HeAn_S_25338_GE485575	GO:0006351
HeAn_S_25338_GE485575	GO:0001071
HeAn_S_25339_GE489287	GO:0044464
HeAn_S_25339_GE489287	GO:0035251
HeAn_S_25339_GE489287	GO:0043234
HeAn_S_25339_GE489287	GO:0006074
HeAn_S_25340_GE489286	GO:0016757
HeAn_S_25340_GE489286	GO:0016740
HeAn_S_25343_GE489282	GO:0006511
HeAn_S_25343_GE489282	GO:0005515
HeAn_S_25343_GE489282	GO:0004221
HeAn_S_25344_GE489280	GO:0007165
HeAn_S_25344_GE489280	GO:0007264
HeAn_S_25344_GE489280	GO:0015031
HeAn_S_25344_GE489280	GO:0005525
HeAn_S_25344_GE489280	GO:0003924
HeAn_S_25344_GE489280	GO:0006184
HeAn_S_25344_GE489280	GO:0006913
HeAn_S_25344_GE489280	GO:0006810
HeAn_S_25344_GE489280	GO:0035556
HeAn_S_25344_GE489280	GO:0032561
HeAn_S_25344_GE489280	GO:0006886
HeAn_S_25344_GE489280	GO:0005622
HeAn_S_25346_GE489278	GO:0005515
HeAn_S_25346_GE489278	GO:0005198
HeAn_S_25347_GE485871	GO:0016740
HeAn_S_25347_GE485871	GO:0016020
HeAn_S_25347_GE485871	GO:0008375
HeAn_S_25351_GE485859	GO:0016021
HeAn_S_25351_GE485859	GO:0006810
HeAn_S_25351_GE485859	GO:0055085
HeAn_S_25351_GE485859	GO:0031224
HeAn_S_25352_GE485569	GO:0044464
HeAn_S_25355_GE485561	GO:0001071
HeAn_S_25355_GE485561	GO:0003700
HeAn_S_25355_GE485561	GO:0005634
HeAn_S_25355_GE485561	GO:0043231
HeAn_S_25355_GE485561	GO:0006351
HeAn_S_25356_GE489276	GO:0005515
HeAn_S_25356_GE489276	GO:0003676
HeAn_S_25356_GE489276	GO:0046914
HeAn_S_25359_GE489266	GO:0006464
HeAn_S_25359_GE489266	GO:0006796
HeAn_S_25359_GE489266	GO:0004672
HeAn_S_25359_GE489266	GO:0032559
HeAn_S_25359_GE489266	GO:0006468
HeAn_S_25359_GE489266	GO:0004672
HeAn_S_25359_GE489266	GO:0016772
HeAn_S_25361_GE485858	GO:0006810
HeAn_S_25361_GE485858	GO:0031224
HeAn_S_25362_GE485857	GO:0005515
HeAn_S_25364_GE485852	GO:0006351
HeAn_S_25366_GE485557	GO:0006464
HeAn_S_25366_GE485557	GO:0016772
HeAn_S_25366_GE485557	GO:0004672
HeAn_S_25366_GE485557	GO:0032559
HeAn_S_25366_GE485557	GO:0005524
HeAn_S_25366_GE485557	GO:0006796
HeAn_S_25366_GE485557	GO:0006468
HeAn_S_25366_GE485557	GO:0004672
HeAn_S_25367_GE485554	GO:0003824
HeAn_S_25367_GE485554	GO:0004372
HeAn_S_25367_GE485554	GO:0006544
HeAn_S_25367_GE485554	GO:0009069
HeAn_S_25367_GE485554	GO:0043231
HeAn_S_25367_GE485554	GO:0006730
HeAn_S_25367_GE485554	GO:0016742
HeAn_S_25367_GE485554	GO:0048037
HeAn_S_25367_GE485554	GO:0030170
HeAn_S_25367_GE485554	GO:0006563
HeAn_S_25368_GE485550	GO:0006721
HeAn_S_25368_GE485550	GO:0008152
HeAn_S_25368_GE485550	GO:0016744
HeAn_S_25368_GE485550	GO:0003824
HeAn_S_25368_GE485550	GO:0006772
HeAn_S_25369_GE485549	GO:0006721
HeAn_S_25369_GE485549	GO:0016744
HeAn_S_25369_GE485549	GO:0006772
HeAn_S_25370_GE489264	GO:0016021
HeAn_S_25370_GE489264	GO:0006810
HeAn_S_25370_GE489264	GO:0055085
HeAn_S_25370_GE489264	GO:0031224
HeAn_S_25371_GE489261	GO:0004134
HeAn_S_25371_GE489261	GO:0044238
HeAn_S_25371_GE489261	GO:0003824
HeAn_S_25371_GE489261	GO:0016740
HeAn_S_25371_GE489261	GO:0009536
HeAn_S_25371_GE489261	GO:0005975
HeAn_S_25371_GE489261	GO:0004133
HeAn_S_25371_GE489261	GO:0043167
HeAn_S_25371_GE489261	GO:0043169
HeAn_S_25372_GE489258	GO:0032559
HeAn_S_25376_GE485839	GO:0016838
HeAn_S_25376_GE485839	GO:0006950
HeAn_S_25376_GE485839	GO:0000287
HeAn_S_25376_GE485839	GO:0016829
HeAn_S_25376_GE485839	GO:0046872
HeAn_S_25376_GE485839	GO:0006644
HeAn_S_25377_GE485838	GO:0006644
HeAn_S_25377_GE485838	GO:0009536
HeAn_S_25377_GE485838	GO:0046872
HeAn_S_25377_GE485838	GO:0008152
HeAn_S_25377_GE485838	GO:0016829
HeAn_S_25377_GE485838	GO:0016838
HeAn_S_25377_GE485838	GO:0006950
HeAn_S_25379_GE485836	GO:0003743
HeAn_S_25379_GE485836	GO:0043231
HeAn_S_25379_GE485836	GO:0006413
HeAn_S_25380_GE485835	GO:0043231
HeAn_S_25380_GE485835	GO:0005737
HeAn_S_25380_GE485835	GO:0005634
HeAn_S_25381_GE489251	GO:0032313
HeAn_S_25381_GE489251	GO:0044464
HeAn_S_25381_GE489251	GO:0005099
HeAn_S_25383_GE489242	GO:0005506
HeAn_S_25383_GE489242	GO:0016491
HeAn_S_25384_GE489241	GO:0020037
HeAn_S_25384_GE489241	GO:0005506
HeAn_S_25384_GE489241	GO:0005506
HeAn_S_25384_GE489241	GO:0055114
HeAn_S_25384_GE489241	GO:0009055
HeAn_S_25384_GE489241	GO:0008152
HeAn_S_25384_GE489241	GO:0016705
HeAn_S_25384_GE489241	GO:0016712
HeAn_S_25385_GE485830	GO:0020037
HeAn_S_25385_GE485830	GO:0009055
HeAn_S_25385_GE485830	GO:0016491
HeAn_S_25385_GE485830	GO:0016705
HeAn_S_25385_GE485830	GO:0005506
HeAn_S_25385_GE485830	GO:0004497
HeAn_S_25385_GE485830	GO:0005506
HeAn_S_25385_GE485830	GO:0055114
HeAn_S_25386_GE485829	GO:0006487
HeAn_S_25386_GE485829	GO:0006486
HeAn_S_25386_GE485829	GO:0008375
HeAn_S_25386_GE485829	GO:0003830
HeAn_S_25386_GE485829	GO:0016020
HeAn_S_25386_GE485829	GO:0044464
HeAn_S_25387_GE485827	GO:0006506
HeAn_S_25387_GE485827	GO:0046872
HeAn_S_25387_GE485827	GO:0005789
HeAn_S_25387_GE485827	GO:0016746
HeAn_S_25387_GE485827	GO:0016021
HeAn_S_25387_GE485827	GO:0044425
HeAn_S_25393_GE489233	GO:0016787
HeAn_S_25393_GE489233	GO:0016787
HeAn_S_25393_GE489233	GO:0016810
HeAn_S_25395_GE489230	GO:0005509
HeAn_S_25395_GE489230	GO:0046872
HeAn_S_25396_GE489226	GO:0055114
HeAn_S_25396_GE489226	GO:0020037
HeAn_S_25396_GE489226	GO:0005506
HeAn_S_25396_GE489226	GO:0009055
HeAn_S_25396_GE489226	GO:0016705
HeAn_S_25396_GE489226	GO:0008152
HeAn_S_25396_GE489226	GO:0016491
HeAn_S_25396_GE489226	GO:0005506
HeAn_S_25397_GE485812	GO:0035004
HeAn_S_25397_GE485812	GO:0006796
HeAn_S_25397_GE485812	GO:0046854
HeAn_S_25397_GE485812	GO:0048017
HeAn_S_25397_GE485812	GO:0005515
HeAn_S_25397_GE485812	GO:0016303
HeAn_S_25397_GE485812	GO:0046488
HeAn_S_25397_GE485812	GO:0048015
HeAn_S_25397_GE485812	GO:0004428
HeAn_S_25397_GE485812	GO:0005942
HeAn_S_25397_GE485812	GO:0043234
HeAn_S_25400_GE485807	GO:0005515
HeAn_S_25401_GE489225	GO:0044238
HeAn_S_25401_GE489225	GO:0016705
HeAn_S_25402_GE489221	GO:0016021
HeAn_S_25402_GE489221	GO:0046923
HeAn_S_25402_GE489221	GO:0006621
HeAn_S_25403_GE489219	GO:0032559
HeAn_S_25403_GE489219	GO:0042623
HeAn_S_25403_GE489219	GO:0008026
HeAn_S_25403_GE489219	GO:0003676
HeAn_S_25403_GE489219	GO:0005524
HeAn_S_25403_GE489219	GO:0003676
HeAn_S_25403_GE489219	GO:0043231
HeAn_S_25404_GE489216	GO:0015833
HeAn_S_25404_GE489216	GO:0016020
HeAn_S_25404_GE489216	GO:0044464
HeAn_S_25404_GE489216	GO:0005215
HeAn_S_25404_GE489216	GO:0006857
HeAn_S_25407_GE485801	GO:0016772
HeAn_S_25407_GE485801	GO:0006468
HeAn_S_25407_GE485801	GO:0004672
HeAn_S_25407_GE485801	GO:0004674
HeAn_S_25407_GE485801	GO:0006464
HeAn_S_25407_GE485801	GO:0032559
HeAn_S_25407_GE485801	GO:0004713
HeAn_S_25407_GE485801	GO:0004672
HeAn_S_25407_GE485801	GO:0006796
HeAn_S_25407_GE485801	GO:0005524
HeAn_S_25413_GE483405	GO:0005515
HeAn_S_25414_GE484660	GO:0016772
HeAn_S_25414_GE484660	GO:0006796
HeAn_S_25414_GE484660	GO:0004672
HeAn_S_25414_GE484660	GO:0006468
HeAn_S_25414_GE484660	GO:0004672
HeAn_S_25415_GE484657	GO:0004871
HeAn_S_25415_GE484657	GO:0005524
HeAn_S_25415_GE484657	GO:0032559
HeAn_S_25415_GE484657	GO:0016772
HeAn_S_25415_GE484657	GO:0004672
HeAn_S_25415_GE484657	GO:0004672
HeAn_S_25415_GE484657	GO:0006796
HeAn_S_25415_GE484657	GO:0004674
HeAn_S_25415_GE484657	GO:0006468
HeAn_S_25415_GE484657	GO:0006464
HeAn_S_25415_GE484657	GO:0009056
HeAn_S_25416_GE484656	GO:0000166
HeAn_S_25416_GE484656	GO:0006796
HeAn_S_25416_GE484656	GO:0043170
HeAn_S_25416_GE484656	GO:0016998
HeAn_S_25416_GE484656	GO:0004672
HeAn_S_25418_GE484653	GO:0016462
HeAn_S_25418_GE484653	GO:0004427
HeAn_S_25418_GE484653	GO:0016020
HeAn_S_25418_GE484653	GO:0016020
HeAn_S_25418_GE484653	GO:0009678
HeAn_S_25418_GE484653	GO:0015992
HeAn_S_25422_GE484648	GO:0031410
HeAn_S_25423_GE484647	GO:0031410
HeAn_S_25425_GE484644	GO:0031410
HeAn_S_25425_GE484644	GO:0007165
HeAn_S_25425_GE484644	GO:0051604
HeAn_S_25425_GE484644	GO:0031224
HeAn_S_25428_GE484637	GO:0043231
HeAn_S_25428_GE484637	GO:0004871
HeAn_S_25428_GE484637	GO:0000160
HeAn_S_25428_GE484637	GO:0000156
HeAn_S_25428_GE484637	GO:0003676
HeAn_S_25428_GE484637	GO:0003677
HeAn_S_25428_GE484637	GO:0006355
HeAn_S_25428_GE484637	GO:0006351
HeAn_S_25428_GE484637	GO:0007165
HeAn_S_25428_GE484637	GO:0005515
HeAn_S_25430_GE484632	GO:0048015
HeAn_S_25430_GE484632	GO:0043234
HeAn_S_25430_GE484632	GO:0046488
HeAn_S_25430_GE484632	GO:0016773
HeAn_S_25430_GE484632	GO:0035004
HeAn_S_25430_GE484632	GO:0016772
HeAn_S_25430_GE484632	GO:0006796
HeAn_S_25430_GE484632	GO:0004428
HeAn_S_25430_GE484632	GO:0046854
HeAn_S_25430_GE484632	GO:0048017
HeAn_S_25431_GE484631	GO:0006796
HeAn_S_25431_GE484631	GO:0004428
HeAn_S_25431_GE484631	GO:0005488
HeAn_S_25431_GE484631	GO:0046854
HeAn_S_25431_GE484631	GO:0046488
HeAn_S_25431_GE484631	GO:0032559
HeAn_S_25431_GE484631	GO:0048015
HeAn_S_25431_GE484631	GO:0043234
HeAn_S_25431_GE484631	GO:0048017
HeAn_S_25431_GE484631	GO:0035004
HeAn_S_25433_GE484622	GO:0016836
HeAn_S_25433_GE484622	GO:0006568
HeAn_S_25433_GE484622	GO:0048037
HeAn_S_25433_GE484622	GO:0030170
HeAn_S_25433_GE484622	GO:0003824
HeAn_S_25433_GE484622	GO:0008152
HeAn_S_25434_GE484621	GO:0016836
HeAn_S_25434_GE484621	GO:0030170
HeAn_S_25434_GE484621	GO:0006568
HeAn_S_25434_GE484621	GO:0008152
HeAn_S_25434_GE484621	GO:0003824
HeAn_S_25434_GE484621	GO:0048037
HeAn_S_25435_GE484616	GO:0043231
HeAn_S_25436_GE484615	GO:0043231
HeAn_S_25437_GE484612	GO:0006468
HeAn_S_25437_GE484612	GO:0004672
HeAn_S_25437_GE484612	GO:0016772
HeAn_S_25437_GE484612	GO:0000166
HeAn_S_25437_GE484612	GO:0004672
HeAn_S_25437_GE484612	GO:0005524
HeAn_S_25437_GE484612	GO:0006796
HeAn_S_25438_GE484611	GO:0006520
HeAn_S_25438_GE484611	GO:0016765
HeAn_S_25438_GE484611	GO:0044424
HeAn_S_25440_GE484605	GO:0051205
HeAn_S_25440_GE484605	GO:0016021
HeAn_S_25440_GE484605	GO:0043231
HeAn_S_25441_GE484604	GO:0051205
HeAn_S_25441_GE484604	GO:0034613
HeAn_S_25441_GE484604	GO:0043231
HeAn_S_25441_GE484604	GO:0031224
HeAn_S_25441_GE484604	GO:0016021
HeAn_S_25449_GE484570	GO:0006857
HeAn_S_25449_GE484570	GO:0015833
HeAn_S_25449_GE484570	GO:0031224
HeAn_S_25449_GE484570	GO:0005215
HeAn_S_25449_GE484570	GO:0016020
HeAn_S_25450_GE484569	GO:0005215
HeAn_S_25450_GE484569	GO:0031224
HeAn_S_25450_GE484569	GO:0016020
HeAn_S_25450_GE484569	GO:0006857
HeAn_S_25450_GE484569	GO:0015833
HeAn_S_25451_GE484563	GO:0016779
HeAn_S_25451_GE484563	GO:0016779
HeAn_S_25451_GE484563	GO:0043231
HeAn_S_25451_GE484563	GO:0003676
HeAn_S_25451_GE484563	GO:0006396
HeAn_S_25451_GE484563	GO:0010467
HeAn_S_25451_GE484563	GO:0003723
HeAn_S_25455_GE485278	GO:0032559
HeAn_S_25455_GE485278	GO:0009207
HeAn_S_25455_GE485278	GO:0005524
HeAn_S_25455_GE485278	GO:0016887
HeAn_S_25455_GE485278	GO:0044464
HeAn_S_25455_GE485278	GO:0017111
HeAn_S_25456_GE485277	GO:0016782
HeAn_S_25464_GE485270	GO:0006508
HeAn_S_25464_GE485270	GO:0008236
HeAn_S_25464_GE485270	GO:0043231
HeAn_S_25464_GE485270	GO:0004252
HeAn_S_25464_GE485270	GO:0008236
HeAn_S_25465_GE485268	GO:0007017
HeAn_S_25465_GE485268	GO:0005488
HeAn_S_25465_GE485268	GO:0032559
HeAn_S_25465_GE485268	GO:0015630
HeAn_S_25465_GE485268	GO:0003774
HeAn_S_25466_GE485267	GO:0007017
HeAn_S_25466_GE485267	GO:0003774
HeAn_S_25466_GE485267	GO:0015630
HeAn_S_25466_GE485267	GO:0007018
HeAn_S_25466_GE485267	GO:0005524
HeAn_S_25466_GE485267	GO:0032559
HeAn_S_25466_GE485267	GO:0003777
HeAn_S_25467_GE485266	GO:0044464
HeAn_S_25467_GE485266	GO:0015698
HeAn_S_25467_GE485266	GO:0006817
HeAn_S_25467_GE485266	GO:0015291
HeAn_S_25467_GE485266	GO:0005315
HeAn_S_25467_GE485266	GO:0016020
HeAn_S_25470_GE484961	GO:0008270
HeAn_S_25470_GE484961	GO:0046872
HeAn_S_25470_GE484961	GO:0005515
HeAn_S_25471_GE484955	GO:0016620
HeAn_S_25471_GE484955	GO:0055114
HeAn_S_25472_GE484954	GO:0016903
HeAn_S_25472_GE484954	GO:0005488
HeAn_S_25472_GE484954	GO:0008152
HeAn_S_25473_GE484953	GO:0043021
HeAn_S_25473_GE484953	GO:0009207
HeAn_S_25473_GE484953	GO:0016020
HeAn_S_25473_GE484953	GO:0009536
HeAn_S_25473_GE484953	GO:0008135
HeAn_S_25473_GE484953	GO:0005525
HeAn_S_25473_GE484953	GO:0032561
HeAn_S_25473_GE484953	GO:0017111
HeAn_S_25473_GE484953	GO:0006412
HeAn_S_25474_GE484951	GO:0003824
HeAn_S_25474_GE484951	GO:0008152
HeAn_S_25474_GE484951	GO:0009058
HeAn_S_25475_GE485260	GO:0055114
HeAn_S_25475_GE485260	GO:0008152
HeAn_S_25475_GE485260	GO:0016620
HeAn_S_25475_GE485260	GO:0016903
HeAn_S_25475_GE485260	GO:0016491
HeAn_S_25475_GE485260	GO:0008152
HeAn_S_25476_GE485258	GO:0004866
HeAn_S_25479_GE485253	GO:0046872
HeAn_S_25479_GE485253	GO:0005515
HeAn_S_25479_GE485253	GO:0008270
HeAn_S_25480_GE485249	GO:0046872
HeAn_S_25480_GE485249	GO:0005506
HeAn_S_25480_GE485249	GO:0055114
HeAn_S_25480_GE485249	GO:0016702
HeAn_S_25480_GE485249	GO:0006633
HeAn_S_25480_GE485249	GO:0016702
HeAn_S_25480_GE485249	GO:0016165
HeAn_S_25480_GE485249	GO:0046914
HeAn_S_25481_GE484947	GO:0005515
HeAn_S_25482_GE484946	GO:0005515
HeAn_S_25483_GE484945	GO:0019538
HeAn_S_25483_GE484945	GO:0070011
HeAn_S_25485_GE484941	GO:0005488
HeAn_S_25485_GE484941	GO:0005515
HeAn_S_25486_GE484940	GO:0003676
HeAn_S_25486_GE484940	GO:0006351
HeAn_S_25486_GE484940	GO:0046914
HeAn_S_25486_GE484940	GO:0003677
HeAn_S_25486_GE484940	GO:0006355
HeAn_S_25486_GE484940	GO:0043231
HeAn_S_25486_GE484940	GO:0003824
HeAn_S_25486_GE484940	GO:0008270
HeAn_S_25486_GE484940	GO:0005515
HeAn_S_25487_GE484938	GO:0032559
HeAn_S_25487_GE484938	GO:0006464
HeAn_S_25487_GE484938	GO:0031224
HeAn_S_25487_GE484938	GO:0016301
HeAn_S_25487_GE484938	GO:0005515
HeAn_S_25491_GE485241	GO:0003824
HeAn_S_25497_GE485233	GO:0006857
HeAn_S_25497_GE485233	GO:0044464
HeAn_S_25497_GE485233	GO:0005215
HeAn_S_25497_GE485233	GO:0015833
HeAn_S_25497_GE485233	GO:0016020
HeAn_S_25501_GE484918	GO:0004185
HeAn_S_25501_GE484918	GO:0019538
HeAn_S_25501_GE484918	GO:0006508
HeAn_S_25501_GE484918	GO:0031410
HeAn_S_25501_GE484918	GO:0004180
HeAn_S_25502_GE484917	GO:0016747
HeAn_S_25502_GE484917	GO:0016747
HeAn_S_25503_GE484916	GO:0016747
HeAn_S_25503_GE484916	GO:0016747
HeAn_S_25503_GE484916	GO:0006725
HeAn_S_25504_GE485221	GO:0003676
HeAn_S_25515_GE485206	GO:0016021
HeAn_S_25515_GE485206	GO:0055085
HeAn_S_25515_GE485206	GO:0006810
HeAn_S_25515_GE485206	GO:0031224
HeAn_S_25516_GE485205	GO:0044464
HeAn_S_25517_GE485204	GO:0004386
HeAn_S_25517_GE485204	GO:0006259
HeAn_S_25517_GE485204	GO:0032559
HeAn_S_25521_GE485198	GO:0016604
HeAn_S_25521_GE485198	GO:0016787
HeAn_S_25521_GE485198	GO:0031090
HeAn_S_25521_GE485198	GO:0004620
HeAn_S_25521_GE485198	GO:0006464
HeAn_S_25521_GE485198	GO:0043169
HeAn_S_25521_GE485198	GO:0005635
HeAn_S_25521_GE485198	GO:0004721
HeAn_S_25521_GE485198	GO:0007165
HeAn_S_25521_GE485198	GO:0031224
HeAn_S_25522_GE485197	GO:0046872
HeAn_S_25522_GE485197	GO:0004722
HeAn_S_25522_GE485197	GO:0031090
HeAn_S_25522_GE485197	GO:0005488
HeAn_S_25522_GE485197	GO:0004620
HeAn_S_25522_GE485197	GO:0031224
HeAn_S_25522_GE485197	GO:0005635
HeAn_S_25522_GE485197	GO:0043169
HeAn_S_25522_GE485197	GO:0005515
HeAn_S_25522_GE485197	GO:0016604
HeAn_S_25522_GE485197	GO:0006464
HeAn_S_25522_GE485197	GO:0007165
HeAn_S_25522_GE485197	GO:0004721
HeAn_S_25524_GE484896	GO:0033014
HeAn_S_25524_GE484896	GO:0016829
HeAn_S_25524_GE484896	GO:0004655
HeAn_S_25524_GE484896	GO:0018130
HeAn_S_25524_GE484896	GO:0033013
HeAn_S_25524_GE484896	GO:0046872
HeAn_S_25525_GE484894	GO:0006508
HeAn_S_25525_GE484894	GO:0004190
HeAn_S_25525_GE484894	GO:0016787
HeAn_S_25531_GE485195	GO:0004221
HeAn_S_25531_GE485195	GO:0005488
HeAn_S_25531_GE485195	GO:0016790
HeAn_S_25531_GE485195	GO:0006511
HeAn_S_25531_GE485195	GO:0019941
HeAn_S_25532_GE485190	GO:0016620
HeAn_S_25532_GE485190	GO:0008152
HeAn_S_25535_GE484883	GO:0003824
HeAn_S_25535_GE484883	GO:0019899
HeAn_S_25535_GE484883	GO:0006511
HeAn_S_25535_GE484883	GO:0019941
HeAn_S_25535_GE484883	GO:0031461
HeAn_S_25535_GE484883	GO:0031625
HeAn_S_25535_GE484883	GO:0000151
HeAn_S_25536_GE484881	GO:0043169
HeAn_S_25536_GE484881	GO:0003824
HeAn_S_25536_GE484881	GO:0004721
HeAn_S_25536_GE484881	GO:0006464
HeAn_S_25536_GE484881	GO:0043234
HeAn_S_25537_GE484880	GO:0006464
HeAn_S_25537_GE484880	GO:0004721
HeAn_S_25537_GE484880	GO:0003824
HeAn_S_25537_GE484880	GO:0043231
HeAn_S_25537_GE484880	GO:0043234
HeAn_S_25537_GE484880	GO:0043169
HeAn_S_25538_GE484876	GO:0006613
HeAn_S_25538_GE484876	GO:0003723
HeAn_S_25538_GE484876	GO:0048500
HeAn_S_25538_GE484876	GO:0030529
HeAn_S_25538_GE484876	GO:0005525
HeAn_S_25538_GE484876	GO:0016462
HeAn_S_25538_GE484876	GO:0008312
HeAn_S_25538_GE484876	GO:0032561
HeAn_S_25538_GE484876	GO:0006614
HeAn_S_25539_GE484872	GO:0006457
HeAn_S_25539_GE484872	GO:0043231
HeAn_S_25539_GE484872	GO:0016859
HeAn_S_25539_GE484872	GO:0018208
HeAn_S_25539_GE484872	GO:0006810
HeAn_S_25539_GE484872	GO:0015031
HeAn_S_25541_GE484030	GO:0070566
HeAn_S_25541_GE484030	GO:0010467
HeAn_S_25542_GE484023	GO:0004672
HeAn_S_25542_GE484023	GO:0032559
HeAn_S_25542_GE484023	GO:0006464
HeAn_S_25542_GE484023	GO:0031224
HeAn_S_25542_GE484023	GO:0004672
HeAn_S_25542_GE484023	GO:0016772
HeAn_S_25542_GE484023	GO:0006796
HeAn_S_25542_GE484023	GO:0004871
HeAn_S_25542_GE484023	GO:0006468
HeAn_S_25542_GE484023	GO:0005524
HeAn_S_25544_GE484020	GO:0016740
HeAn_S_25546_GE484017	GO:0004372
HeAn_S_25546_GE484017	GO:0006563
HeAn_S_25546_GE484017	GO:0003824
HeAn_S_25546_GE484017	GO:0044237
HeAn_S_25546_GE484017	GO:0006544
HeAn_S_25546_GE484017	GO:0030170
HeAn_S_25546_GE484017	GO:0044281
HeAn_S_25546_GE484017	GO:0016740
HeAn_S_25547_GE484012	GO:0016020
HeAn_S_25548_GE484009	GO:0022857
HeAn_S_25548_GE484009	GO:0006810
HeAn_S_25548_GE484009	GO:0055085
HeAn_S_25548_GE484009	GO:0022857
HeAn_S_25548_GE484009	GO:0016021
HeAn_S_25548_GE484009	GO:0016020
HeAn_S_25549_GE484005	GO:0006468
HeAn_S_25549_GE484005	GO:0006464
HeAn_S_25549_GE484005	GO:0004672
HeAn_S_25549_GE484005	GO:0004713
HeAn_S_25549_GE484005	GO:0004672
HeAn_S_25549_GE484005	GO:0016772
HeAn_S_25549_GE484005	GO:0005524
HeAn_S_25549_GE484005	GO:0032559
HeAn_S_25549_GE484005	GO:0004674
HeAn_S_25550_GE484002	GO:0005488
HeAn_S_25551_GE484001	GO:0008152
HeAn_S_25551_GE484001	GO:0008152
HeAn_S_25551_GE484001	GO:0003824
HeAn_S_25551_GE484001	GO:0005488
HeAn_S_25551_GE484001	GO:0016491
HeAn_S_25552_GE483998	GO:0008152
HeAn_S_25552_GE483998	GO:0055114
HeAn_S_25552_GE483998	GO:0016620
HeAn_S_25552_GE483998	GO:0016620
HeAn_S_25552_GE483998	GO:0008152
HeAn_S_25552_GE483998	GO:0016491
HeAn_S_25557_GE483984	GO:0006857
HeAn_S_25557_GE483984	GO:0015833
HeAn_S_25557_GE483984	GO:0005215
HeAn_S_25557_GE483984	GO:0031224
HeAn_S_25557_GE483984	GO:0016020
HeAn_S_25558_GE483982	GO:0006418
HeAn_S_25558_GE483982	GO:0004812
HeAn_S_25558_GE483982	GO:0044424
HeAn_S_25558_GE483982	GO:0043039
HeAn_S_25558_GE483982	GO:0005737
HeAn_S_25558_GE483982	GO:0004812
HeAn_S_25558_GE483982	GO:0000049
HeAn_S_25558_GE483982	GO:0005524
HeAn_S_25558_GE483982	GO:0032559
HeAn_S_25558_GE483982	GO:0003723
HeAn_S_25559_GE483980	GO:0000287
HeAn_S_25559_GE483980	GO:0016829
HeAn_S_25560_GE483978	GO:0043231
HeAn_S_25560_GE483978	GO:0005488
HeAn_S_25561_GE483977	GO:0005488
HeAn_S_25562_GE483974	GO:0008152
HeAn_S_25562_GE483974	GO:0004650
HeAn_S_25562_GE483974	GO:0005975
HeAn_S_25562_GE483974	GO:0016798
HeAn_S_25564_GE483968	GO:0005576
HeAn_S_25564_GE483968	GO:0016491
HeAn_S_25564_GE483968	GO:0009808
HeAn_S_25564_GE483968	GO:0005507
HeAn_S_25564_GE483968	GO:0046914
HeAn_S_25564_GE483968	GO:0055114
HeAn_S_25564_GE483968	GO:0016682
HeAn_S_25565_GE483964	GO:0010333
HeAn_S_25565_GE483964	GO:0004435
HeAn_S_25565_GE483964	GO:0035556
HeAn_S_25565_GE483964	GO:0007165
HeAn_S_25565_GE483964	GO:0008081
HeAn_S_25565_GE483964	GO:0006629
HeAn_S_25565_GE483964	GO:0046872
HeAn_S_25567_GE483962	GO:0044464
HeAn_S_25569_GE483958	GO:0043231
HeAn_S_25571_GE483951	GO:0005992
HeAn_S_25571_GE483951	GO:0003824
HeAn_S_25571_GE483951	GO:0005991
HeAn_S_25573_GE483942	GO:0004672
HeAn_S_25573_GE483942	GO:0004713
HeAn_S_25573_GE483942	GO:0005524
HeAn_S_25573_GE483942	GO:0004674
HeAn_S_25573_GE483942	GO:0016772
HeAn_S_25573_GE483942	GO:0004672
HeAn_S_25573_GE483942	GO:0006468
HeAn_S_25573_GE483942	GO:0006796
HeAn_S_25574_GE483941	GO:0005515
HeAn_S_25574_GE483941	GO:0004672
HeAn_S_25574_GE483941	GO:0007165
HeAn_S_25574_GE483941	GO:0006464
HeAn_S_25574_GE483941	GO:0006796
HeAn_S_25574_GE483941	GO:0032559
HeAn_S_25575_GE483940	GO:0005515
HeAn_S_25576_GE483939	GO:0005515
HeAn_S_25577_GE483938	GO:0046914
HeAn_S_25577_GE483938	GO:0006511
HeAn_S_25577_GE483938	GO:0004221
HeAn_S_25577_GE483938	GO:0016790
HeAn_S_25577_GE483938	GO:0044464
HeAn_S_25577_GE483938	GO:0019941
HeAn_S_25580_GE483723	GO:0005515
HeAn_S_25580_GE483723	GO:0031072
HeAn_S_25581_GE483715	GO:0043231
HeAn_S_25583_GE483712	GO:0006508
HeAn_S_25583_GE483712	GO:0004222
HeAn_S_25583_GE483712	GO:0032559
HeAn_S_25583_GE483712	GO:0004175
HeAn_S_25583_GE483712	GO:0017111
HeAn_S_25583_GE483712	GO:0009207
HeAn_S_25583_GE483712	GO:0005524
HeAn_S_25583_GE483712	GO:0009057
HeAn_S_25583_GE483712	GO:0044464
HeAn_S_25583_GE483712	GO:0019538
HeAn_S_25584_GE483710	GO:0004672
HeAn_S_25584_GE483710	GO:0006468
HeAn_S_25584_GE483710	GO:0009987
HeAn_S_25584_GE483710	GO:0000166
HeAn_S_25584_GE483710	GO:0004672
HeAn_S_25584_GE483710	GO:0016772
HeAn_S_25585_GE483709	GO:0004672
HeAn_S_25585_GE483709	GO:0016772
HeAn_S_25585_GE483709	GO:0004672
HeAn_S_25585_GE483709	GO:0004713
HeAn_S_25585_GE483709	GO:0005488
HeAn_S_25585_GE483709	GO:0006468
HeAn_S_25585_GE483709	GO:0009987
HeAn_S_25587_GE483702	GO:0003824
HeAn_S_25589_GE483694	GO:0030001
HeAn_S_25589_GE483694	GO:0046872
HeAn_S_25590_GE483693	GO:0044424
HeAn_S_25590_GE483693	GO:0005524
HeAn_S_25590_GE483693	GO:0009108
HeAn_S_25590_GE483693	GO:0016301
HeAn_S_25590_GE483693	GO:0004140
HeAn_S_25590_GE483693	GO:0032559
HeAn_S_25590_GE483693	GO:0015937
HeAn_S_25592_GE483690	GO:0016772
HeAn_S_25594_GE483679	GO:0005737
HeAn_S_25594_GE483679	GO:0006419
HeAn_S_25594_GE483679	GO:0004813
HeAn_S_25594_GE483679	GO:0005524
HeAn_S_25594_GE483679	GO:0032559
HeAn_S_25594_GE483679	GO:0000166
HeAn_S_25594_GE483679	GO:0006418
HeAn_S_25594_GE483679	GO:0009536
HeAn_S_25594_GE483679	GO:0003723
HeAn_S_25594_GE483679	GO:0043169
HeAn_S_25594_GE483679	GO:0004812
HeAn_S_25600_GE483669	GO:0003824
HeAn_S_25600_GE483669	GO:0016842
HeAn_S_25600_GE483669	GO:0006188
HeAn_S_25600_GE483669	GO:0009168
HeAn_S_25600_GE483669	GO:0004018
HeAn_S_25603_GE483664	GO:0006351
HeAn_S_25603_GE483664	GO:0003677
HeAn_S_25603_GE483664	GO:0006412
HeAn_S_25603_GE483664	GO:0008135
HeAn_S_25603_GE483664	GO:0005515
HeAn_S_25603_GE483664	GO:0043231
HeAn_S_25603_GE483664	GO:0006355
HeAn_S_25603_GE483664	GO:0046914
HeAn_S_25604_GE483662	GO:0008652
HeAn_S_25604_GE483662	GO:0016616
HeAn_S_25604_GE483662	GO:0008652
HeAn_S_25604_GE483662	GO:0000166
HeAn_S_25604_GE483662	GO:0009536
HeAn_S_25604_GE483662	GO:0031406
HeAn_S_25604_GE483662	GO:0006796
HeAn_S_25604_GE483662	GO:0016774
HeAn_S_25606_GE483659	GO:0043231
HeAn_S_25606_GE483659	GO:0005524
HeAn_S_25606_GE483659	GO:0004672
HeAn_S_25606_GE483659	GO:0006468
HeAn_S_25606_GE483659	GO:0016772
HeAn_S_25606_GE483659	GO:0016772
HeAn_S_25608_GE483653	GO:0004743
HeAn_S_25608_GE483653	GO:0044237
HeAn_S_25608_GE483653	GO:0046872
HeAn_S_25608_GE483653	GO:0003824
HeAn_S_25608_GE483653	GO:0030955
HeAn_S_25608_GE483653	GO:0000287
HeAn_S_25608_GE483653	GO:0006096
HeAn_S_25608_GE483653	GO:0016301
HeAn_S_25611_GE483644	GO:0016788
HeAn_S_25611_GE483644	GO:0030599
HeAn_S_25611_GE483644	GO:0005618
HeAn_S_25611_GE483644	GO:0042545
HeAn_S_25613_GE483639	GO:0006996
HeAn_S_25613_GE483639	GO:0007010
HeAn_S_25613_GE483639	GO:0003779
HeAn_S_25613_GE483639	GO:0032989
HeAn_S_25613_GE483639	GO:0008092
HeAn_S_25614_GE483638	GO:0043231
HeAn_S_25614_GE483638	GO:0006351
HeAn_S_25616_GE483635	GO:0005509
HeAn_S_25616_GE483635	GO:0046872
HeAn_S_25618_GE483632	GO:0004571
HeAn_S_25618_GE483632	GO:0016020
HeAn_S_25618_GE483632	GO:0044464
HeAn_S_25618_GE483632	GO:0015924
HeAn_S_25618_GE483632	GO:0005509
HeAn_S_25618_GE483632	GO:0046872
HeAn_S_25622_GE484350	GO:0030244
HeAn_S_25622_GE484350	GO:0045229
HeAn_S_25622_GE484350	GO:0016020
HeAn_S_25622_GE484350	GO:0016759
HeAn_S_25622_GE484350	GO:0009250
HeAn_S_25622_GE484350	GO:0031224
HeAn_S_25622_GE484350	GO:0016760
HeAn_S_25624_GE484344	GO:0044464
HeAn_S_25624_GE484344	GO:0005099
HeAn_S_25624_GE484344	GO:0032313
HeAn_S_25624_GE484344	GO:0005622
HeAn_S_25624_GE484344	GO:0005097
HeAn_S_25624_GE484344	GO:0032313
HeAn_S_25625_GE484343	GO:0005099
HeAn_S_25625_GE484343	GO:0032313
HeAn_S_25625_GE484343	GO:0032313
HeAn_S_25625_GE484343	GO:0044464
HeAn_S_25625_GE484343	GO:0005097
HeAn_S_25625_GE484343	GO:0005622
HeAn_S_25626_GE484339	GO:0016772
HeAn_S_25626_GE484339	GO:0016772
HeAn_S_25627_GE484338	GO:0016740
HeAn_S_25627_GE484338	GO:0044464
HeAn_S_25628_GE484337	GO:0016740
HeAn_S_25628_GE484337	GO:0044464
HeAn_S_25628_GE484337	GO:0016020
HeAn_S_25629_GE484335	GO:0008152
HeAn_S_25629_GE484335	GO:0003824
HeAn_S_25630_GE484334	GO:0019538
HeAn_S_25630_GE484334	GO:0009987
HeAn_S_25630_GE484334	GO:0008237
HeAn_S_25630_GE484334	GO:0043169
HeAn_S_25631_GE484333	GO:0043169
HeAn_S_25631_GE484333	GO:0016787
HeAn_S_25631_GE484333	GO:0008237
HeAn_S_25631_GE484333	GO:0019538
HeAn_S_25633_GE484329	GO:0031410
HeAn_S_25633_GE484329	GO:0016787
HeAn_S_25633_GE484329	GO:0046872
HeAn_S_25633_GE484329	GO:0003993
HeAn_S_25636_GE484323	GO:0009987
HeAn_S_25637_GE484320	GO:0003723
HeAn_S_25637_GE484320	GO:0005488
HeAn_S_25637_GE484320	GO:0005488
HeAn_S_25639_GE484308	GO:0051234
HeAn_S_25639_GE484308	GO:0031224
HeAn_S_25639_GE484308	GO:0019866
HeAn_S_25641_GE484301	GO:0032559
HeAn_S_25641_GE484301	GO:0004713
HeAn_S_25641_GE484301	GO:0004672
HeAn_S_25641_GE484301	GO:0004672
HeAn_S_25641_GE484301	GO:0005524
HeAn_S_25641_GE484301	GO:0006464
HeAn_S_25641_GE484301	GO:0006796
HeAn_S_25641_GE484301	GO:0016772
HeAn_S_25641_GE484301	GO:0004674
HeAn_S_25641_GE484301	GO:0006468
HeAn_S_25642_GE484298	GO:0043231
HeAn_S_25643_GE484297	GO:0005515
HeAn_S_25646_GE484289	GO:0046914
HeAn_S_25652_GE484276	GO:0019888
HeAn_S_25652_GE484276	GO:0005488
HeAn_S_25652_GE484276	GO:0000159
HeAn_S_25652_GE484276	GO:0007165
HeAn_S_25652_GE484276	GO:0008601
HeAn_S_25652_GE484276	GO:0023052
HeAn_S_25652_GE484276	GO:0008287
HeAn_S_25653_GE484275	GO:0005488
HeAn_S_25653_GE484275	GO:0005509
HeAn_S_25654_GE484272	GO:0005515
HeAn_S_25655_GE484271	GO:0046872
HeAn_S_25655_GE484271	GO:0003676
HeAn_S_25656_GE484270	GO:0043231
HeAn_S_25656_GE484270	GO:0046872
HeAn_S_25656_GE484270	GO:0006259
HeAn_S_25656_GE484270	GO:0003676
HeAn_S_25657_GE484264	GO:0016772
HeAn_S_25658_GE484262	GO:0030170
HeAn_S_25658_GE484262	GO:0003824
HeAn_S_25658_GE484262	GO:0030151
HeAn_S_25658_GE484262	GO:0005488
HeAn_S_25661_GE484253	GO:0016838
HeAn_S_25661_GE484253	GO:0006644
HeAn_S_25661_GE484253	GO:0046872
HeAn_S_25661_GE484253	GO:0016829
HeAn_S_25661_GE484253	GO:0006950
HeAn_S_25661_GE484253	GO:0009536
HeAn_S_25661_GE484253	GO:0000287
HeAn_S_25662_GE484252	GO:0046872
HeAn_S_25662_GE484252	GO:0008152
HeAn_S_25662_GE484252	GO:0006950
HeAn_S_25662_GE484252	GO:0016838
HeAn_S_25662_GE484252	GO:0016829
HeAn_S_25662_GE484252	GO:0009536
HeAn_S_25662_GE484252	GO:0006644
HeAn_S_25667_GE485480	GO:0009987
HeAn_S_25667_GE485480	GO:0008238
HeAn_S_25668_GE485479	GO:0016787
HeAn_S_25668_GE485479	GO:0003824
HeAn_S_25670_GE485475	GO:0005515
HeAn_S_25671_GE485472	GO:0043229
HeAn_S_25671_GE485472	GO:0006351
HeAn_S_25672_GE485471	GO:0006351
HeAn_S_25673_GE485466	GO:0043231
HeAn_S_25674_GE485465	GO:0043231
HeAn_S_25674_GE485465	GO:0043169
HeAn_S_25675_GE485464	GO:0005524
HeAn_S_25675_GE485464	GO:0004672
HeAn_S_25675_GE485464	GO:0016772
HeAn_S_25675_GE485464	GO:0006464
HeAn_S_25675_GE485464	GO:0004672
HeAn_S_25675_GE485464	GO:0006468
HeAn_S_25675_GE485464	GO:0032559
HeAn_S_25676_GE485462	GO:0006508
HeAn_S_25676_GE485462	GO:0019538
HeAn_S_25676_GE485462	GO:0004252
HeAn_S_25676_GE485462	GO:0004175
HeAn_S_25676_GE485462	GO:0042623
HeAn_S_25676_GE485462	GO:0004176
HeAn_S_25676_GE485462	GO:0032559
HeAn_S_25677_GE485461	GO:0032559
HeAn_S_25677_GE485461	GO:0019538
HeAn_S_25677_GE485461	GO:0042623
HeAn_S_25677_GE485461	GO:0000166
HeAn_S_25677_GE485461	GO:0004175
HeAn_S_25677_GE485461	GO:0017111
HeAn_S_25677_GE485461	GO:0005524
HeAn_S_25678_GE485457	GO:0044464
HeAn_S_25678_GE485457	GO:0046872
HeAn_S_25679_GE485454	GO:0043231
HeAn_S_25680_GE485453	GO:0005488
HeAn_S_25687_GE485446	GO:0043231
HeAn_S_25687_GE485446	GO:0009451
HeAn_S_25687_GE485446	GO:0003676
HeAn_S_25687_GE485446	GO:0003723
HeAn_S_25687_GE485446	GO:0001522
HeAn_S_25687_GE485446	GO:0009982
HeAn_S_25687_GE485446	GO:0016866
HeAn_S_25687_GE485446	GO:0009451
HeAn_S_25689_GE485435	GO:0005488
HeAn_S_25690_GE485433	GO:0032559
HeAn_S_25690_GE485433	GO:0005524
HeAn_S_25690_GE485433	GO:0005737
HeAn_S_25690_GE485433	GO:0004812
HeAn_S_25690_GE485433	GO:0004828
HeAn_S_25690_GE485433	GO:0000166
HeAn_S_25690_GE485433	GO:0006418
HeAn_S_25690_GE485433	GO:0044424
HeAn_S_25690_GE485433	GO:0006434
HeAn_S_25690_GE485433	GO:0004812
HeAn_S_25690_GE485433	GO:0006418
HeAn_S_25691_GE485432	GO:0004812
HeAn_S_25691_GE485432	GO:0000166
HeAn_S_25691_GE485432	GO:0006418
HeAn_S_25691_GE485432	GO:0000166
HeAn_S_25691_GE485432	GO:0004828
HeAn_S_25691_GE485432	GO:0005524
HeAn_S_25691_GE485432	GO:0006434
HeAn_S_25691_GE485432	GO:0005737
HeAn_S_25692_GE485429	GO:0005524
HeAn_S_25692_GE485429	GO:0019205
HeAn_S_25692_GE485429	GO:0006139
HeAn_S_25694_GE485425	GO:0005488
HeAn_S_25695_GE485424	GO:0003676
HeAn_S_25695_GE485424	GO:0046872
HeAn_S_25698_GE485409	GO:0042254
HeAn_S_25698_GE485409	GO:0005515
HeAn_S_25698_GE485409	GO:0043231
HeAn_S_25699_GE485408	GO:0005634
HeAn_S_25699_GE485408	GO:0043231
HeAn_S_25699_GE485408	GO:0006364
HeAn_S_25699_GE485408	GO:0042254
HeAn_S_25700_GE485406	GO:0003824
HeAn_S_25702_GE485404	GO:0016491
HeAn_S_25702_GE485404	GO:0009055
HeAn_S_25702_GE485404	GO:0046914
HeAn_S_25702_GE485404	GO:0055114
HeAn_S_25702_GE485404	GO:0008152
HeAn_S_25702_GE485404	GO:0003824
HeAn_S_25702_GE485404	GO:0046872
HeAn_S_25703_GE485403	GO:0016881
HeAn_S_25709_GE485393	GO:0031228
HeAn_S_25709_GE485393	GO:0016757
HeAn_S_25709_GE485393	GO:0006464
HeAn_S_25712_GE485176	GO:0044464
HeAn_S_25713_GE485167	GO:0043231
HeAn_S_25713_GE485167	GO:0005509
HeAn_S_25714_GE485165	GO:0016020
HeAn_S_25714_GE485165	GO:0003333
HeAn_S_25714_GE485165	GO:0015171
HeAn_S_25714_GE485165	GO:0006810
HeAn_S_25714_GE485165	GO:0016020
HeAn_S_25716_GE485159	GO:0044238
HeAn_S_25716_GE485159	GO:0016798
HeAn_S_25717_GE485158	GO:0006818
HeAn_S_25717_GE485158	GO:0003824
HeAn_S_25717_GE485158	GO:0019829
HeAn_S_25717_GE485158	GO:0009205
HeAn_S_25717_GE485158	GO:0005975
HeAn_S_25717_GE485158	GO:0015078
HeAn_S_25717_GE485158	GO:0004553
HeAn_S_25717_GE485158	GO:0043167
HeAn_S_25717_GE485158	GO:0043169
HeAn_S_25717_GE485158	GO:0015923
HeAn_S_25717_GE485158	GO:0043234
HeAn_S_25718_GE485155	GO:0000166
HeAn_S_25718_GE485155	GO:0006259
HeAn_S_25719_GE485154	GO:0003676
HeAn_S_25719_GE485154	GO:0005524
HeAn_S_25719_GE485154	GO:0043231
HeAn_S_25719_GE485154	GO:0006259
HeAn_S_25719_GE485154	GO:0005634
HeAn_S_25719_GE485154	GO:0032559
HeAn_S_25719_GE485154	GO:0003677
HeAn_S_25719_GE485154	GO:0006270
HeAn_S_25719_GE485154	GO:0006260
HeAn_S_25721_GE485152	GO:0000166
HeAn_S_25721_GE485152	GO:0003676
HeAn_S_25726_GE485143	GO:0016597
HeAn_S_25726_GE485143	GO:0008152
HeAn_S_25726_GE485143	GO:0006796
HeAn_S_25726_GE485143	GO:0016774
HeAn_S_25726_GE485143	GO:0006520
HeAn_S_25726_GE485143	GO:0031406
HeAn_S_25733_GE485128	GO:0044464
HeAn_S_25734_GE485119	GO:0033178
HeAn_S_25734_GE485119	GO:0016469
HeAn_S_25734_GE485119	GO:0015078
HeAn_S_25734_GE485119	GO:0046961
HeAn_S_25734_GE485119	GO:0009534
HeAn_S_25734_GE485119	GO:0019829
HeAn_S_25734_GE485119	GO:0015988
HeAn_S_25734_GE485119	GO:0005524
HeAn_S_25734_GE485119	GO:0015662
HeAn_S_25734_GE485119	GO:0015992
HeAn_S_25734_GE485119	GO:0046034
HeAn_S_25734_GE485119	GO:0032559
HeAn_S_25734_GE485119	GO:0046933
HeAn_S_25734_GE485119	GO:0015986
HeAn_S_25735_GE485116	GO:0003006
HeAn_S_25735_GE485116	GO:0044420
HeAn_S_25735_GE485116	GO:0006633
HeAn_S_25735_GE485116	GO:0043231
HeAn_S_25736_GE485115	GO:0008152
HeAn_S_25736_GE485115	GO:0016491
HeAn_S_25736_GE485115	GO:0005506
HeAn_S_25736_GE485115	GO:0006633
HeAn_S_25736_GE485115	GO:0016020
HeAn_S_25736_GE485115	GO:0055114
HeAn_S_25739_GE485110	GO:0003824
HeAn_S_25739_GE485110	GO:0046914
HeAn_S_25739_GE485110	GO:0008152
HeAn_S_25739_GE485110	GO:0055114
HeAn_S_25739_GE485110	GO:0008270
HeAn_S_25739_GE485110	GO:0016491
HeAn_S_25743_GE485101	GO:0006768
HeAn_S_25743_GE485101	GO:0003824
HeAn_S_25743_GE485101	GO:0051540
HeAn_S_25743_GE485101	GO:0051536
HeAn_S_25743_GE485101	GO:0008152
HeAn_S_25743_GE485101	GO:0016783
HeAn_S_25749_GE485081	GO:0043231
HeAn_S_25753_GE484832	GO:0008239
HeAn_S_25753_GE484832	GO:0006508
HeAn_S_25753_GE484832	GO:0008238
HeAn_S_25753_GE484832	GO:0019538
HeAn_S_25753_GE484832	GO:0005737
HeAn_S_25753_GE484832	GO:0044424
HeAn_S_25754_GE484829	GO:0003824
HeAn_S_25754_GE484829	GO:0016787
HeAn_S_25755_GE484828	GO:0016787
HeAn_S_25755_GE484828	GO:0003824
HeAn_S_25764_GE484810	GO:0043231
HeAn_S_25765_GE484808	GO:0005488
HeAn_S_25768_GE484792	GO:0031224
HeAn_S_25769_GE484789	GO:0008270
HeAn_S_25769_GE484789	GO:0046914
HeAn_S_25769_GE484789	GO:0005515
HeAn_S_25770_GE484786	GO:0005488
HeAn_S_25770_GE484786	GO:0005515
HeAn_S_25770_GE484786	GO:0003676
HeAn_S_25771_GE484785	GO:0030874
HeAn_S_25771_GE484785	GO:0007126
HeAn_S_25771_GE484785	GO:0070076
HeAn_S_25771_GE484785	GO:0003676
HeAn_S_25771_GE484785	GO:0003723
HeAn_S_25771_GE484785	GO:0009553
HeAn_S_25771_GE484785	GO:0005515
HeAn_S_25773_GE484783	GO:0043231
HeAn_S_25774_GE484780	GO:0005506
HeAn_S_25774_GE484780	GO:0055114
HeAn_S_25774_GE484780	GO:0016705
HeAn_S_25774_GE484780	GO:0008152
HeAn_S_25774_GE484780	GO:0004497
HeAn_S_25774_GE484780	GO:0005506
HeAn_S_25774_GE484780	GO:0016491
HeAn_S_25774_GE484780	GO:0009055
HeAn_S_25774_GE484780	GO:0020037
HeAn_S_25775_GE484779	GO:0016705
HeAn_S_25775_GE484779	GO:0055114
HeAn_S_25775_GE484779	GO:0009055
HeAn_S_25775_GE484779	GO:0020037
HeAn_S_25775_GE484779	GO:0016491
HeAn_S_25775_GE484779	GO:0046872
HeAn_S_25775_GE484779	GO:0005506
HeAn_S_25776_GE484770	GO:0031410
HeAn_S_25776_GE484770	GO:0008219
HeAn_S_25776_GE484770	GO:0016021
HeAn_S_25777_GE484769	GO:0008219
HeAn_S_25777_GE484769	GO:0016021
HeAn_S_25778_GE484768	GO:0043231
HeAn_S_25778_GE484768	GO:0006259
HeAn_S_25780_GE483932	GO:0016837
HeAn_S_25782_GE483927	GO:0031410
HeAn_S_25782_GE483927	GO:0043167
HeAn_S_25782_GE483927	GO:0003824
HeAn_S_25782_GE483927	GO:0004553
HeAn_S_25782_GE483927	GO:0016798
HeAn_S_25782_GE483927	GO:0043169
HeAn_S_25782_GE483927	GO:0005975
HeAn_S_25782_GE483927	GO:0044238
HeAn_S_25785_GE483923	GO:0005515
HeAn_S_25786_GE483922	GO:0031410
HeAn_S_25789_GE483613	GO:0004252
HeAn_S_25789_GE483613	GO:0003824
HeAn_S_25789_GE483613	GO:0006508
HeAn_S_25795_GE483916	GO:0006007
HeAn_S_25795_GE483916	GO:0030955
HeAn_S_25795_GE483916	GO:0031420
HeAn_S_25795_GE483916	GO:0032559
HeAn_S_25795_GE483916	GO:0006796
HeAn_S_25795_GE483916	GO:0044424
HeAn_S_25795_GE483916	GO:0006096
HeAn_S_25795_GE483916	GO:0000287
HeAn_S_25795_GE483916	GO:0016301
HeAn_S_25795_GE483916	GO:0004743
HeAn_S_25796_GE483912	GO:0006528
HeAn_S_25796_GE483912	GO:0009064
HeAn_S_25796_GE483912	GO:0016884
HeAn_S_25796_GE483912	GO:0006529
HeAn_S_25796_GE483912	GO:0004066
HeAn_S_25797_GE483911	GO:0006528
HeAn_S_25797_GE483911	GO:0016884
HeAn_S_25798_GE483910	GO:0005515
HeAn_S_25800_GE483604	GO:0003924
HeAn_S_25800_GE483604	GO:0005525
HeAn_S_25801_GE483603	GO:0016020
HeAn_S_25801_GE483603	GO:0032561
HeAn_S_25801_GE483603	GO:0005525
HeAn_S_25801_GE483603	GO:0016651
HeAn_S_25801_GE483603	GO:0009207
HeAn_S_25801_GE483603	GO:0003924
HeAn_S_25801_GE483603	GO:0017111
HeAn_S_25807_GE483899	GO:0005524
HeAn_S_25807_GE483899	GO:0030983
HeAn_S_25807_GE483899	GO:0006298
HeAn_S_25811_GE483588	GO:0005515
HeAn_S_25811_GE483588	GO:0012501
HeAn_S_25811_GE483588	GO:0006952
HeAn_S_25811_GE483588	GO:0032559
HeAn_S_25813_GE483586	GO:0005515
HeAn_S_25815_GE483883	GO:0004519
HeAn_S_25815_GE483883	GO:0003824
HeAn_S_25815_GE483883	GO:0006284
HeAn_S_25815_GE483883	GO:0051539
HeAn_S_25815_GE483883	GO:0051536
HeAn_S_25815_GE483883	GO:0004518
HeAn_S_25815_GE483883	GO:0006281
HeAn_S_25815_GE483883	GO:0006281
HeAn_S_25816_GE483582	GO:0005215
HeAn_S_25816_GE483582	GO:0006810
HeAn_S_25816_GE483582	GO:0044464
HeAn_S_25816_GE483582	GO:0055085
HeAn_S_25816_GE483582	GO:0006810
HeAn_S_25816_GE483582	GO:0016020
HeAn_S_25817_GE483576	GO:0005618
HeAn_S_25817_GE483576	GO:0008716
HeAn_S_25817_GE483576	GO:0016874
HeAn_S_25817_GE483576	GO:0009252
HeAn_S_25817_GE483576	GO:0003824
HeAn_S_25817_GE483576	GO:0016874
HeAn_S_25817_GE483576	GO:0005524
HeAn_S_25817_GE483576	GO:0005488
HeAn_S_25819_GE483882	GO:0016020
HeAn_S_25820_GE483872	GO:0015291
HeAn_S_25820_GE483872	GO:0015698
HeAn_S_25820_GE483872	GO:0031224
HeAn_S_25823_GE483566	GO:0016772
HeAn_S_25824_GE483560	GO:0005515
HeAn_S_25824_GE483560	GO:0005488
HeAn_S_25825_GE483558	GO:0003824
HeAn_S_25825_GE483558	GO:0008152
HeAn_S_25825_GE483558	GO:0003824
HeAn_S_25827_GE483862	GO:0016741
HeAn_S_25827_GE483862	GO:0008168
HeAn_S_25827_GE483862	GO:0006730
HeAn_S_25828_GE483861	GO:0006730
HeAn_S_25828_GE483861	GO:0016741
HeAn_S_25828_GE483861	GO:0008168
HeAn_S_25829_GE483557	GO:0016620
HeAn_S_25829_GE483557	GO:0055114
HeAn_S_25830_GE483556	GO:0008152
HeAn_S_25830_GE483556	GO:0016903
HeAn_S_25830_GE483556	GO:0005488
HeAn_S_25839_GE483848	GO:0044238
HeAn_S_25839_GE483848	GO:0016758
HeAn_S_25839_GE483848	GO:0005975
HeAn_S_25839_GE483848	GO:0004645
HeAn_S_25839_GE483848	GO:0048037
HeAn_S_25841_GE483844	GO:0005488
HeAn_S_25843_GE483541	GO:0016226
HeAn_S_25844_GE483539	GO:0003676
HeAn_S_25844_GE483539	GO:0016817
HeAn_S_25845_GE483538	GO:0017111
HeAn_S_25845_GE483538	GO:0003676
HeAn_S_25845_GE483538	GO:0032559
HeAn_S_25851_GE483835	GO:0005216
HeAn_S_25851_GE483835	GO:0005247
HeAn_S_25851_GE483835	GO:0031224
HeAn_S_25851_GE483835	GO:0055085
HeAn_S_25851_GE483835	GO:0006821
HeAn_S_25851_GE483835	GO:0005254
HeAn_S_25851_GE483835	GO:0016020
HeAn_S_25851_GE483835	GO:0015698
HeAn_S_25852_GE483832	GO:0005975
HeAn_S_25852_GE483832	GO:0043169
HeAn_S_25852_GE483832	GO:0016798
HeAn_S_25852_GE483832	GO:0003824
HeAn_S_25852_GE483832	GO:0004553
HeAn_S_25852_GE483832	GO:0008152
HeAn_S_25853_GE483831	GO:0031410
HeAn_S_25853_GE483831	GO:0044238
HeAn_S_25853_GE483831	GO:0043167
HeAn_S_25853_GE483831	GO:0005975
HeAn_S_25853_GE483831	GO:0016798
HeAn_S_25853_GE483831	GO:0004553
HeAn_S_25853_GE483831	GO:0003824
HeAn_S_25853_GE483831	GO:0043169
HeAn_S_25854_GE483526	GO:0008270
HeAn_S_25859_GE484240	GO:0043169
HeAn_S_25859_GE484240	GO:0004553
HeAn_S_25859_GE484240	GO:0015925
HeAn_S_25859_GE484240	GO:0003824
HeAn_S_25859_GE484240	GO:0044238
HeAn_S_25859_GE484240	GO:0030246
HeAn_S_25859_GE484240	GO:0005975
HeAn_S_25859_GE484240	GO:0043167
HeAn_S_25873_GE484203	GO:0009207
HeAn_S_25873_GE484203	GO:0032559
HeAn_S_25873_GE484203	GO:0044464
HeAn_S_25873_GE484203	GO:0017111
HeAn_S_25873_GE484203	GO:0016020
HeAn_S_25878_GE484192	GO:0006397
HeAn_S_25878_GE484192	GO:0016772
HeAn_S_25878_GE484192	GO:0032559
HeAn_S_25878_GE484192	GO:0004672
HeAn_S_25878_GE484192	GO:0004521
HeAn_S_25878_GE484192	GO:0016891
HeAn_S_25878_GE484192	GO:0005515
HeAn_S_25878_GE484192	GO:0006396
HeAn_S_25878_GE484192	GO:0006464
HeAn_S_25879_GE484188	GO:0016491
HeAn_S_25879_GE484188	GO:0016638
HeAn_S_25879_GE484188	GO:0006536
HeAn_S_25879_GE484188	GO:0008152
HeAn_S_25879_GE484188	GO:0055114
HeAn_S_25880_GE484187	GO:0006536
HeAn_S_25880_GE484187	GO:0006537
HeAn_S_25880_GE484187	GO:0015930
HeAn_S_25880_GE484187	GO:0016638
HeAn_S_25880_GE484187	GO:0055114
HeAn_S_25880_GE484187	GO:0003824
HeAn_S_25880_GE484187	GO:0008152
HeAn_S_25880_GE484187	GO:0015930
HeAn_S_25880_GE484187	GO:0016491
HeAn_S_25882_GE484175	GO:0005515
HeAn_S_25891_GE484157	GO:0015925
HeAn_S_25891_GE484157	GO:0004553
HeAn_S_25891_GE484157	GO:0005975
HeAn_S_25891_GE484157	GO:0030246
HeAn_S_25891_GE484157	GO:0044238
HeAn_S_25891_GE484157	GO:0043167
HeAn_S_25891_GE484157	GO:0043169
HeAn_S_25891_GE484157	GO:0003824
HeAn_S_25898_GE484552	GO:0006351
HeAn_S_25898_GE484552	GO:0043231
HeAn_S_25898_GE484552	GO:0006355
HeAn_S_25898_GE484552	GO:0005634
HeAn_S_25905_GE484539	GO:0005215
HeAn_S_25905_GE484539	GO:0016020
HeAn_S_25905_GE484539	GO:0006857
HeAn_S_25905_GE484539	GO:0015833
HeAn_S_25905_GE484539	GO:0044464
HeAn_S_25910_GE484532	GO:0005515
HeAn_S_25911_GE484530	GO:0006419
HeAn_S_25911_GE484530	GO:0005737
HeAn_S_25911_GE484530	GO:0006418
HeAn_S_25911_GE484530	GO:0004812
HeAn_S_25911_GE484530	GO:0005524
HeAn_S_25911_GE484530	GO:0004813
HeAn_S_25911_GE484530	GO:0032559
HeAn_S_25911_GE484530	GO:0044424
HeAn_S_25911_GE484530	GO:0000166
HeAn_S_25912_GE484525	GO:0005488
HeAn_S_25913_GE484524	GO:0005524
HeAn_S_25913_GE484524	GO:0004672
HeAn_S_25913_GE484524	GO:0016772
HeAn_S_25913_GE484524	GO:0032559
HeAn_S_25913_GE484524	GO:0006468
HeAn_S_25913_GE484524	GO:0004672
HeAn_S_25913_GE484524	GO:0004674
HeAn_S_25913_GE484524	GO:0005515
HeAn_S_25913_GE484524	GO:0006464
HeAn_S_25913_GE484524	GO:0004713
HeAn_S_25915_GE484522	GO:0046914
HeAn_S_25915_GE484522	GO:0003676
HeAn_S_25915_GE484522	GO:0044464
HeAn_S_25917_GE484511	GO:0032559
HeAn_S_25917_GE484511	GO:0017111
HeAn_S_25917_GE484511	GO:0019058
HeAn_S_25919_GE484503	GO:0005488
HeAn_S_25920_GE484501	GO:0031224
HeAn_S_25920_GE484501	GO:0006810
HeAn_S_25926_GE484483	GO:0005198
HeAn_S_25926_GE484483	GO:0030117
HeAn_S_25926_GE484483	GO:0016192
HeAn_S_25926_GE484483	GO:0006886
HeAn_S_25926_GE484483	GO:0005515
HeAn_S_25926_GE484483	GO:0043566
HeAn_S_25927_GE484482	GO:0005515
HeAn_S_25930_GE484471	GO:0031410
HeAn_S_25930_GE484471	GO:0050896
HeAn_S_25930_GE484471	GO:0044267
HeAn_S_25930_GE484471	GO:0005515
HeAn_S_25931_GE484465	GO:0015833
HeAn_S_25931_GE484465	GO:0044464
HeAn_S_25931_GE484465	GO:0006857
HeAn_S_25931_GE484465	GO:0005215
HeAn_S_25931_GE484465	GO:0016020
HeAn_S_25932_GE484464	GO:0006857
HeAn_S_25932_GE484464	GO:0015833
HeAn_S_25932_GE484464	GO:0044464
HeAn_S_25932_GE484464	GO:0005215
HeAn_S_25932_GE484464	GO:0016020
HeAn_S_25933_GE484460	GO:0043234
HeAn_S_25934_GE484455	GO:0005515
HeAn_S_25935_GE485390	GO:0009808
HeAn_S_25935_GE485390	GO:0005507
HeAn_S_25935_GE485390	GO:0016491
HeAn_S_25935_GE485390	GO:0055114
HeAn_S_25935_GE485390	GO:0046914
HeAn_S_25935_GE485390	GO:0005576
HeAn_S_25935_GE485390	GO:0016682
HeAn_S_25936_GE485389	GO:0046914
HeAn_S_25936_GE485389	GO:0016682
HeAn_S_25936_GE485389	GO:0005576
HeAn_S_25936_GE485389	GO:0016491
HeAn_S_25936_GE485389	GO:0009808
HeAn_S_25936_GE485389	GO:0005507
HeAn_S_25936_GE485389	GO:0055114
HeAn_S_25939_GE485378	GO:0019842
HeAn_S_25939_GE485378	GO:0003824
HeAn_S_25939_GE485378	GO:0046872
HeAn_S_25939_GE485378	GO:0003824
HeAn_S_25939_GE485378	GO:0030976
HeAn_S_25940_GE485377	GO:0003824
HeAn_S_25940_GE485377	GO:0046872
HeAn_S_25940_GE485377	GO:0019842
HeAn_S_25940_GE485377	GO:0030976
HeAn_S_25942_GE485375	GO:0016817
HeAn_S_25945_GE485370	GO:0006310
HeAn_S_25945_GE485370	GO:0005524
HeAn_S_25945_GE485370	GO:0006266
HeAn_S_25945_GE485370	GO:0006281
HeAn_S_25945_GE485370	GO:0044464
HeAn_S_25945_GE485370	GO:0032559
HeAn_S_25945_GE485370	GO:0033554
HeAn_S_25945_GE485370	GO:0003676
HeAn_S_25945_GE485370	GO:0003910
HeAn_S_25945_GE485370	GO:0003909
HeAn_S_25946_GE485369	GO:0003909
HeAn_S_25946_GE485369	GO:0033554
HeAn_S_25946_GE485369	GO:0044464
HeAn_S_25946_GE485369	GO:0003677
HeAn_S_25946_GE485369	GO:0006310
HeAn_S_25946_GE485369	GO:0032559
HeAn_S_25946_GE485369	GO:0003676
HeAn_S_25946_GE485369	GO:0006266
HeAn_S_25946_GE485369	GO:0003910
HeAn_S_25946_GE485369	GO:0006281
HeAn_S_25948_GE485363	GO:0008152
HeAn_S_25951_GE485356	GO:0043234
HeAn_S_25951_GE485356	GO:0044464
HeAn_S_25951_GE485356	GO:0006074
HeAn_S_25951_GE485356	GO:0035251
HeAn_S_25956_GE485336	GO:0005634
HeAn_S_25956_GE485336	GO:0006334
HeAn_S_25957_GE485335	GO:0032559
HeAn_S_25957_GE485335	GO:0044267
HeAn_S_25957_GE485335	GO:0051082
HeAn_S_25957_GE485335	GO:0005524
HeAn_S_25957_GE485335	GO:0005515
HeAn_S_25957_GE485335	GO:0006950
HeAn_S_25957_GE485335	GO:0006457
HeAn_S_25957_GE485335	GO:0044424
HeAn_S_25957_GE485335	GO:0050896
HeAn_S_25959_GE485333	GO:0044464
HeAn_S_25960_GE485327	GO:0005488
HeAn_S_25960_GE485327	GO:0009987
HeAn_S_25962_GE485312	GO:0016747
HeAn_S_25962_GE485312	GO:0016746
HeAn_S_25963_GE485308	GO:0004437
HeAn_S_25964_GE485307	GO:0004437
HeAn_S_25964_GE485307	GO:0016791
HeAn_S_25964_GE485307	GO:0043231
HeAn_S_25965_GE485304	GO:0016671
HeAn_S_25965_GE485304	GO:0019725
HeAn_S_25965_GE485304	GO:0045454
HeAn_S_25965_GE485304	GO:0000097
HeAn_S_25966_GE485303	GO:0008152
HeAn_S_25966_GE485303	GO:0003824
HeAn_S_25966_GE485303	GO:0016667
HeAn_S_25966_GE485303	GO:0019725
HeAn_S_25966_GE485303	GO:0006790
HeAn_S_25971_GE485295	GO:0006464
HeAn_S_25971_GE485295	GO:0016020
HeAn_S_25971_GE485295	GO:0046872
HeAn_S_25971_GE485295	GO:0005524
HeAn_S_25971_GE485295	GO:0004672
HeAn_S_25971_GE485295	GO:0032559
HeAn_S_25971_GE485295	GO:0006468
HeAn_S_25971_GE485295	GO:0016772
HeAn_S_25971_GE485295	GO:0004674
HeAn_S_25971_GE485295	GO:0006796
HeAn_S_25971_GE485295	GO:0004672
HeAn_S_25973_GE485290	GO:0032559
HeAn_S_25973_GE485290	GO:0043232
HeAn_S_25974_GE485288	GO:0003676
HeAn_S_25974_GE485288	GO:0005488
HeAn_S_25974_GE485288	GO:0000166
HeAn_S_25976_GE485077	GO:0043531
HeAn_S_25976_GE485077	GO:0004872
HeAn_S_25976_GE485077	GO:0006952
HeAn_S_25976_GE485077	GO:0012501
HeAn_S_25976_GE485077	GO:0023052
HeAn_S_25976_GE485077	GO:0032559
HeAn_S_25976_GE485077	GO:0044425
HeAn_S_25976_GE485077	GO:0006952
HeAn_S_25977_GE485074	GO:0055085
HeAn_S_25977_GE485074	GO:0015893
HeAn_S_25977_GE485074	GO:0015238
HeAn_S_25977_GE485074	GO:0016020
HeAn_S_25977_GE485074	GO:0015297
HeAn_S_25977_GE485074	GO:0044464
HeAn_S_25977_GE485074	GO:0015291
HeAn_S_25977_GE485074	GO:0006855
HeAn_S_25978_GE485072	GO:0005488
HeAn_S_25980_GE485068	GO:0043231
HeAn_S_25981_GE485066	GO:0016747
HeAn_S_25984_GE485060	GO:0003779
HeAn_S_25988_GE485043	GO:0055114
HeAn_S_25988_GE485043	GO:0050662
HeAn_S_25988_GE485043	GO:0044281
HeAn_S_25988_GE485043	GO:0031410
HeAn_S_25988_GE485043	GO:0016614
HeAn_S_25988_GE485043	GO:0016614
HeAn_S_25989_GE485035	GO:0015450
HeAn_S_25989_GE485035	GO:0016020
HeAn_S_25989_GE485035	GO:0015031
HeAn_S_25989_GE485035	GO:0008320
HeAn_S_25989_GE485035	GO:0006810
HeAn_S_25989_GE485035	GO:0043231
HeAn_S_25996_GE485016	GO:0044267
HeAn_S_25996_GE485016	GO:0005515
HeAn_S_25996_GE485016	GO:0031410
HeAn_S_25996_GE485016	GO:0006950
HeAn_S_25996_GE485016	GO:0044432
HeAn_S_25996_GE485016	GO:0006457
HeAn_S_25996_GE485016	GO:0005524
HeAn_S_25996_GE485016	GO:0051082
HeAn_S_25996_GE485016	GO:0032559
HeAn_S_25996_GE485016	GO:0050896
HeAn_S_25999_GE485011	GO:0008152
HeAn_S_25999_GE485011	GO:0016758
HeAn_S_25999_GE485011	GO:0016758
HeAn_S_25999_GE485011	GO:0008194
HeAn_S_26002_GE485004	GO:0005515
HeAn_S_26006_GE484994	GO:0016702
HeAn_S_26006_GE484994	GO:0046872
HeAn_S_26006_GE484994	GO:0006633
HeAn_S_26006_GE484994	GO:0046914
HeAn_S_26006_GE484994	GO:0055114
HeAn_S_26006_GE484994	GO:0016702
HeAn_S_26007_GE484993	GO:0008152
HeAn_S_26007_GE484993	GO:0046872
HeAn_S_26007_GE484993	GO:0016702
HeAn_S_26007_GE484993	GO:0055114
HeAn_S_26007_GE484993	GO:0005515
HeAn_S_26008_GE484990	GO:0005622
HeAn_S_26008_GE484990	GO:0006508
HeAn_S_26008_GE484990	GO:0004177
HeAn_S_26009_GE484987	GO:0006397
HeAn_S_26009_GE484987	GO:0006396
HeAn_S_26010_GE484985	GO:0008152
HeAn_S_26010_GE484985	GO:0003824
HeAn_S_26011_GE484983	GO:0006464
HeAn_S_26011_GE484983	GO:0006796
HeAn_S_26011_GE484983	GO:0016772
HeAn_S_26011_GE484983	GO:0032559
HeAn_S_26011_GE484983	GO:0004672
HeAn_S_26011_GE484983	GO:0004713
HeAn_S_26011_GE484983	GO:0004674
HeAn_S_26011_GE484983	GO:0005524
HeAn_S_26011_GE484983	GO:0006468
HeAn_S_26011_GE484983	GO:0004672
HeAn_S_26016_GE484756	GO:0008270
HeAn_S_26016_GE484756	GO:0005083
HeAn_S_26016_GE484756	GO:0032312
HeAn_S_26016_GE484756	GO:0032012
HeAn_S_26016_GE484756	GO:0046914
HeAn_S_26016_GE484756	GO:0008060
HeAn_S_26017_GE484752	GO:0016491
HeAn_S_26017_GE484752	GO:0046914
HeAn_S_26017_GE484752	GO:0008152
HeAn_S_26017_GE484752	GO:0016616
HeAn_S_26017_GE484752	GO:0051536
HeAn_S_26017_GE484752	GO:0055114
HeAn_S_26017_GE484752	GO:0050662
HeAn_S_26018_GE484751	GO:0044424
HeAn_S_26018_GE484751	GO:0008152
HeAn_S_26018_GE484751	GO:0046914
HeAn_S_26019_GE484744	GO:0003824
HeAn_S_26021_GE484742	GO:0043231
HeAn_S_26021_GE484742	GO:0010467
HeAn_S_26021_GE484742	GO:0003676
HeAn_S_26028_GE484728	GO:0031224
HeAn_S_26028_GE484728	GO:0016021
HeAn_S_26031_GE484710	GO:0016758
HeAn_S_26031_GE484710	GO:0008152
HeAn_S_26031_GE484710	GO:0016757
HeAn_S_26032_GE484709	GO:0006812
HeAn_S_26032_GE484709	GO:0005451
HeAn_S_26032_GE484709	GO:0015299
HeAn_S_26032_GE484709	GO:0016021
HeAn_S_26032_GE484709	GO:0055067
HeAn_S_26032_GE484709	GO:0030001
HeAn_S_26032_GE484709	GO:0031224
HeAn_S_26033_GE484708	GO:0055067
HeAn_S_26033_GE484708	GO:0030001
HeAn_S_26033_GE484708	GO:0006814
HeAn_S_26033_GE484708	GO:0015299
HeAn_S_26033_GE484708	GO:0006812
HeAn_S_26033_GE484708	GO:0005451
HeAn_S_26033_GE484708	GO:0055085
HeAn_S_26033_GE484708	GO:0015385
HeAn_S_26033_GE484708	GO:0031224
HeAn_S_26033_GE484708	GO:0006885
HeAn_S_26033_GE484708	GO:0043231
HeAn_S_26033_GE484708	GO:0016021
HeAn_S_26034_GE484701	GO:0043231
HeAn_S_26046_GE484678	GO:0008601
HeAn_S_26046_GE484678	GO:0000159
HeAn_S_26046_GE484678	GO:0019888
HeAn_S_26046_GE484678	GO:0008287
HeAn_S_26046_GE484678	GO:0005515
HeAn_S_26046_GE484678	GO:0023052
HeAn_S_26046_GE484678	GO:0007165
HeAn_S_26047_GE484677	GO:0008287
HeAn_S_26047_GE484677	GO:0000159
HeAn_S_26047_GE484677	GO:0023052
HeAn_S_26047_GE484677	GO:0007165
HeAn_S_26047_GE484677	GO:0019888
HeAn_S_26047_GE484677	GO:0008601
HeAn_S_26050_GE484139	GO:0003824
HeAn_S_26050_GE484139	GO:0030170
HeAn_S_26050_GE484139	GO:0044281
HeAn_S_26050_GE484139	GO:0006544
HeAn_S_26050_GE484139	GO:0044237
HeAn_S_26050_GE484139	GO:0004372
HeAn_S_26050_GE484139	GO:0006563
HeAn_S_26050_GE484139	GO:0016740
HeAn_S_26051_GE484134	GO:0043231
HeAn_S_26051_GE484134	GO:0006351
HeAn_S_26051_GE484134	GO:0005515
HeAn_S_26051_GE484134	GO:0005515
HeAn_S_26052_GE484133	GO:0005516
[truncated: 14,384 more rows]
